# Supplementary material for: Rationale and cross-sectional study design of the Research on Obesity and type 2 Diabetes among African Migrants: the RODAM study
Source: PubMed Central journal article supplement — BMJ Open. 2014 Mar 21;4(3):e004877. doi: 10.1136/bmjopen-2014-004877 (PMC3963103; doi:10.1136/bmjopen-2014-004877), 2014-03-21
Supplement: bmjopen-2014-004877.draft_revisions.pdf [file bmjopen-2014-004877.draft_revisions.pdf]

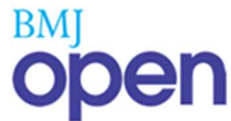

**Rational and cross-sectional study design of the Research on Obesity and Type 2 Diabetes among African Migrants: The RODAM study**

|                                 |                                                                                                                                                                                                                                                                                                                                                                                                                                                                                                                                                                                                                                                                                                                                                                                                                                                                                                                                                                                                                                                                                                                                                                                                                                                                                                                                                                                                                                                                                                                                                                                                                                                                                                                                                                                                                                                                                                                                    |
|---------------------------------|------------------------------------------------------------------------------------------------------------------------------------------------------------------------------------------------------------------------------------------------------------------------------------------------------------------------------------------------------------------------------------------------------------------------------------------------------------------------------------------------------------------------------------------------------------------------------------------------------------------------------------------------------------------------------------------------------------------------------------------------------------------------------------------------------------------------------------------------------------------------------------------------------------------------------------------------------------------------------------------------------------------------------------------------------------------------------------------------------------------------------------------------------------------------------------------------------------------------------------------------------------------------------------------------------------------------------------------------------------------------------------------------------------------------------------------------------------------------------------------------------------------------------------------------------------------------------------------------------------------------------------------------------------------------------------------------------------------------------------------------------------------------------------------------------------------------------------------------------------------------------------------------------------------------------------|
| Journal:                        | <i>BMJ Open</i>                                                                                                                                                                                                                                                                                                                                                                                                                                                                                                                                                                                                                                                                                                                                                                                                                                                                                                                                                                                                                                                                                                                                                                                                                                                                                                                                                                                                                                                                                                                                                                                                                                                                                                                                                                                                                                                                                                                    |
| Manuscript ID:                  | bmjopen-2014-004877                                                                                                                                                                                                                                                                                                                                                                                                                                                                                                                                                                                                                                                                                                                                                                                                                                                                                                                                                                                                                                                                                                                                                                                                                                                                                                                                                                                                                                                                                                                                                                                                                                                                                                                                                                                                                                                                                                                |
| Article Type:                   | Protocol                                                                                                                                                                                                                                                                                                                                                                                                                                                                                                                                                                                                                                                                                                                                                                                                                                                                                                                                                                                                                                                                                                                                                                                                                                                                                                                                                                                                                                                                                                                                                                                                                                                                                                                                                                                                                                                                                                                           |
| Date Submitted by the Author:   | 17-Jan-2014                                                                                                                                                                                                                                                                                                                                                                                                                                                                                                                                                                                                                                                                                                                                                                                                                                                                                                                                                                                                                                                                                                                                                                                                                                                                                                                                                                                                                                                                                                                                                                                                                                                                                                                                                                                                                                                                                                                        |
| Complete List of Authors:       | <p>Agyemang, Charles; Amsterdam Medical Center<br/>         Beune, Erik; Academic Medical Centre, Public Health<br/>         Meeks, Karlijn; Academic Medical Centre, Public Health<br/>         Owusu-Dabo, Ellis; Kwame Nkrumah University of Science and Technology, Faculty of Science<br/>         de-Graft Aikins, Ama; University of Ghana, The Regional Institute for Population Studies<br/>         Smeeth, Liam; London School of Hygiene and Tropical Medicine, Epidemiology and Population Health<br/>         Addo, Juliet; London School of Hygiene and Tropical Medicine, Epidemiology and Population Health<br/>         Mockenhaupt, Frank; Charité – Universitätsmedizin Berlin, Institute of Tropical Medicine and International Health<br/>         Amoah, Stephen; Charité – Universitätsmedizin Berlin, Institute of Tropical Medicine and International Health<br/>         Schulze, Matthias; German Institute of Human Nutrition, Danquah, Ina; German Institute of Human Nutrition,<br/>         Spranger, Joachim; Charité – Universitätsmedizin Berlin, Department of Endocrinology, Diabetes and Nutrition<br/>         Nicolaou, Mary; Academic Medical Centre, Public Health<br/>         Klipstein-Grobusch, Kirstin; University Medical Center, Julius Center for Health Sciences and Primary Care<br/>         Burr, Tom; Source BioScience,<br/>         Henneman, Peter; Academic Medical Centre, Department of Clinical Genetics<br/>         Mannens, Marcel; Academic Medical Centre, Department of Clinical Genetics<br/>         van Straalen, Jan<br/>         Bahendeka, Silver; IDF, African Region,<br/>         Zwinderman, AH; Academic Medical Centre, Public Health<br/>         Kunst, Anton; University of Amsterdam, Dept. of Public Health, Academic Medical Center (AMC)<br/>         Stronks, Karien; Academic Medical Centre / University of Amsterdam, Public Health</p> |
| <b>Primary Subject Heading</b>: | Diabetes and endocrinology                                                                                                                                                                                                                                                                                                                                                                                                                                                                                                                                                                                                                                                                                                                                                                                                                                                                                                                                                                                                                                                                                                                                                                                                                                                                                                                                                                                                                                                                                                                                                                                                                                                                                                                                                                                                                                                                                                         |
| Secondary Subject Heading:      | Diabetes and endocrinology, Cardiovascular medicine, Global health, Epidemiology, Nutrition and metabolism                                                                                                                                                                                                                                                                                                                                                                                                                                                                                                                                                                                                                                                                                                                                                                                                                                                                                                                                                                                                                                                                                                                                                                                                                                                                                                                                                                                                                                                                                                                                                                                                                                                                                                                                                                                                                         |

1  
2  
3  
4  
5  
6  
7  
8  
9  
10  
11  
12  
13  
14  
15  
16  
17  
18  
19  
20  
21  
22  
23  
24  
25  
26  
27  
28  
29  
30  
31  
32  
33  
34  
35  
36  
37  
38  
39  
40  
41  
42  
43  
44  
45  
46  
47  
48  
49  
50  
51  
52  
53  
54  
55  
56  
57  
58  
59  
60

|           |                                                                                                |
|-----------|------------------------------------------------------------------------------------------------|
| Keywords: | General diabetes < DIABETES & ENDOCRINOLOGY, EPIDEMIOLOGY, Public health < INFECTIOUS DISEASES |
|           |                                                                                                |

SCHOLARONE™  
Manuscripts

For peer review only

**Rational and cross-sectional study design of the Research on Obesity and Type 2 Diabetes among African Migrants: The RODAM study**

Charles Agyemang<sup>1\*</sup>, Erik Beune<sup>1</sup>, Karlijn Meeks<sup>1</sup>, Ellis Owusu-Dabo<sup>2</sup>, Ama de-Graft Aikins<sup>3</sup>, Liam Smeeth<sup>4</sup>, Juliet Addo<sup>4</sup>, Frank Mockenhaupt<sup>5</sup>, Stephen Amoah<sup>5</sup>, Matthias B. Schulze<sup>6</sup>, Ina Danquah<sup>6</sup>, Jochen Spranger<sup>7</sup>, Mary Nicolaou N<sup>1</sup>, Kirstin Klipstein-Grobusch<sup>8,9</sup>, Tom Burr<sup>10</sup>, Peter Henneman<sup>11</sup>, Marcel M. Mannens<sup>11</sup>, Jan P. van Straalen<sup>12</sup>, Silver Bahendeka<sup>13</sup>, AH Zwinderman<sup>14</sup>, Anton E. Kunst<sup>1</sup>, Karien Stronks<sup>1</sup>.

1. Department of Public Health, Academic Medical Centre (AMC), University of Amsterdam, Amsterdam, The Netherlands.
2. Faculty of Science, Kwame Nkrumah University of Science and Technology, Kumasi, Ghana.
3. The Regional Institute for Population Studies: University of Ghana, Legon, Ghana.
4. Department of Non-communicable Disease Epidemiology, London School of Hygiene and Tropical Medicine, London, UK.
5. Institute of Tropical Medicine and International Health, Charité – Universitätsmedizin Berlin, Berlin, Germany.
6. Department of Molecular Epidemiology, German Institute of Human Nutrition (DIfE), Potsdam-Rehbruecke, Nuthetal, Germany.
7. Department of Endocrinology, Diabetes and Nutrition, Charité – Universitätsmedizin Berlin, Germany.
8. Julius Center for Health Sciences and Primary Care, University Medical Center, Utrecht, Netherlands.
9. Division of Epidemiology and Biostatistics, School of Public Health, Faculty of Health Sciences, University of the Witwatersrand, Johannesburg, South Africa.
10. Source BioScience, Nottingham, UK.
11. Department of Clinical Genetics, Academic Medical Centre, Amsterdam, The Netherlands.
12. Department of Clinical Chemistry, Academic Medical Centre, Amsterdam, The Netherlands.
13. International Diabetes Federation, Africa Region, Kampala, Uganda.
14. Department of Clinical Epidemiology, Bioinformatics, and Biostatistics, Academic Medical Centre, University of Amsterdam, Amsterdam, The Netherlands.

---

\*Correspondence to: Dr Charles Agyemang, Department of Public Health, Academic Medical Centre, University of Amsterdam, Meibergdreef 9, 1105 AZ Amsterdam, The Netherlands, Tel: 0031 20 5664885, Fax: 0031 20 6972316. Email: c.o.agyemang@amc.uva.nl

## Abstract

**Background:** Obesity and type 2 diabetes (T2D) are highly prevalent among African migrant compared to European descent populations. The underlying reasons still remain a puzzle. Gene-environmental interaction is now seen as a potential plausible factor contributing to the high prevalence of obesity and T2D, but has not yet been investigated. The overall aim of the RODAM (Research on Obesity and Diabetes among African Migrants) project is to understand the reasons for the high prevalence of obesity and T2D among Sub-Saharan Africans in diaspora by (a) studying the complex interplay between environment (e.g. lifestyle), healthcare, biochemical and (epi)genetics and their relative contributions to the high prevalence of obesity and T2D; (b) to identify specific risk factors within these broad categories to guide intervention programmes; and (c) to provide a basic knowledge for improving diagnosis and treatment.

**Methods and Analysis:** RODAM is a multi-centre cross-sectional survey among homogenous Sub-Saharan African participants (i.e. Ghanaians) aged >25 years living in rural and urban Ghana, Netherlands, Germany, and the UK (<http://rod-am.eu/>). Standardised data on the main outcomes (obesity and T2D), environmental factors (e.g. lifestyle, socio-economic factors, psychosocial stress and healthcare access), genetics and biochemical factors are collected in all locations. The aim is to recruit 6,250 individuals comprising five subgroups of 1,250 from each site (i.e. rural-Ghana, urban-Ghana, Netherlands, Germany and UK). In Ghana, Kumasi and Obuasi (urban stratum) and 15 villages in the Ashanti region (rural stratum) are served as recruitment sites. In Europe, Ghanaian migrants are selected through the municipality or Ghanaian organisations registers.

**Ethics and dissemination:** Ethical approval has been obtained in all sites. This paper gives an overview of the rationale, conceptual framework and methods of the RODAM study. The differences in obesity and T2D prevalence within Ghana on the one hand, and between three European countries on the other, will allow us to gain insight into environmental, biochemical and (epi)genetic factors contributing to the occurrence of obesity and T2D among these populations. The new insights will inform targeted intervention and prevention programmes, and provide a basis for improving diagnosis and treatment in these populations and beyond.

**Keywords:** Ethnicity, Migrants, African continental origin, Ghana, Obesity, Type 2 diabetes, Genetic, Epigenetics

## Introduction

Ethnic minority and migrant populations in Europe have been disproportionately affected by both obesity and diabetes compared with the host European origin populations (henceforth, Europeans).<sup>1-4</sup> The prevalence of type 2 diabetes (T2D), for example, is about three to five times higher than in Europeans.<sup>4</sup> They also develop T2D at a younger age; and they have higher morbidity and mortality from T2D and related complications such as cardiovascular disease (CVD) than European populations.<sup>4,5</sup> The little available information suggests that sub-Saharan Africa (SSA) migrants are particularly affected by obesity and T2D.<sup>3</sup> In the Health Survey for England (HSE) 2004, the prevalence rates of T2D were 16.2% and 6.0% in sub-Saharan African men and women aged  $\geq 35$  years compared with 5.1% and 2.4% in English general population men and women, respectively.<sup>6</sup>

Obesity and T2D prevalence rates are not only escalating among SSA migrants, but also in their home countries. The increasing levels of obesity and T2D in SSA countries have been unprecedented and pose huge challenges for many countries. While T2D seemed to be virtually absent, for example, in West Africa in the 1960s and 1980s (0.2-1.7%), today it has become a major health problem affecting almost 7% of the adult population.<sup>7-10</sup> Projections indicate that the number of T2D patients in SSA will double from 14.7 million in 2011 to 28 million in 2020,<sup>11</sup> undoubtedly among one of the highest growth rates of T2D worldwide.<sup>11,12</sup> This correlates with the simultaneous increase of obesity in the same region.<sup>7</sup> A systematic review found that the prevalence of obesity in urban West Africa has more than doubled over 15 years.<sup>9</sup> The serious cardiovascular complications of obesity and T2D could overwhelm SSA countries that are already straining under the burden of communicable diseases.

The reasons for the increased susceptibility of ethnic minority groups and migrants to obesity and T2D are poorly understood. Increased T2D prevalence and complications in African populations both in SSA and industrialised countries have been attributed to delayed diagnosis and poor management due to low socioeconomic status (SES). However, ethnic differences persist even when demographic, SES, behavioural and clinical parameters have been taken into account,<sup>13</sup> suggesting that other factors such as genetic predispositions might be important. The validity of this finding, nonetheless, is limited because of the heterogeneity of migrants studied so far. Heritability estimates for T2D range up to 40%,<sup>14-15</sup> but genetic variations thus far identified, contribute only a small fraction of the inherited risk.<sup>16</sup> While genetic factors alone cannot explain the increasing prevalence of obesity and T2D, it is clear that the high prevalence of obesity and T2D is a result of a complex interplay of environmental and genetic factors that are likely to vary in different settings and among different population groups. Genetic predispositions and interactions between environmental and genetic factors may be involved in the onset and development of diseases such as obesity and T2D among migrant populations. The 'thrifty genotype' and 'thrifty phenotype' hypotheses are considered to be the underlying mechanism of the gene-environment interaction contribution to disease susceptibility.<sup>17-21</sup> While gene-environment interactions may play an important role in disease susceptibility, research in this area, particularly within the context of human migration is in its infancy.

The high levels of obesity and T2D among migrant populations may also be influenced by lifestyle changes following migration<sup>3</sup> as well as psychological stress.<sup>22</sup> Evidence from cohort studies demonstrate the importance of lifestyle factors such as physical inactivity and smoking on obesity and T2D.<sup>23-27</sup> However, among migrant populations, interventions to reduce obesity and T2D have often been ineffective,<sup>28</sup> and efforts often fail to meet the specific needs of ethnic minority and migrant populations.<sup>29</sup> The local circumstances of ethnic minority and migrant populations, such as socioeconomic development of the groups, race relations and access to health care and preventive

1  
2  
3 services, may differ greatly among industrialised countries.<sup>30-31</sup> These differential contexts can  
4 influence health behaviour, psychosocial stress and health care use among ethnic minority and migrant  
5 groups, and subsequently lead to differences in CVD health outcomes between similar populations  
6 living in different countries.  
7

8 The RODAM project - an European Commission funded project – aims to understand the reasons for  
9 the high prevalence of obesity and T2D among African migrants by (a) studying the complex interplay  
10 between environmental exposures and genetics and their relative contributions to the high prevalence  
11 of obesity and T2D; (b) to identify specific risk factors within these broad categories to guide  
12 intervention programmes, and (c) to provide a basic knowledge for improving diagnosis and treatment.  
13 A conceptual model of the RODAM project is presented in Figure 1.<sup>32</sup> It shows that following  
14 migration, migrants may be exposed to varied contexts, such as different opportunities for socio-  
15 economic development, different availability of food supply, different health systems and policies, and  
16 different cultural traditions; and these differences may influence their health behaviour, physical and  
17 psychosocial stress and subsequently lead to differences in obesity and T2D risks.  
18  
19  
20  
21

## 22 **Methods**

23  
24 To achieve RODAM study goals, a multi-disciplinary consortium of researchers from Europe  
25 (University of Amsterdam, Utrecht University, London School of Hygiene and Tropical Medicine,  
26 Charité - Universitätsmedizin Berlin, German Institute of Human Nutrition) and Africa (University of  
27 Ghana, Kwame Nkrumah University of Science and Technology and the International Diabetes  
28 Federation (IDF), African region) with broad experience on chronic diseases in Africans and African  
29 migrants have joined forces. As a central feature of the RODAM project, at all study sites, highly  
30 standardised protocols of quantitative and qualitative assessments are applied for participant  
31 recruitment and topic-related investigations.  
32  
33

### 34 *Study Population*

35  
36 Assessing the role of gene-environmental interactions in risk factors, such as obesity and T2D, among  
37 migrant populations requires a highly standardised approach and relatively homogeneous migrating  
38 and non-migrating populations. For this reason, we concentrate on a relatively homogenous SSA  
39 migrant population to enable comparisons of the prevalence of obesity and T2D between SSA  
40 migrants living in different European countries and their compatriots living in rural and urban SSA  
41 as outlined in the *WHO Global Consultation on Migrant Health* report.<sup>33</sup> Consequently, adult Ghanaians  
42 (aged  $\geq 25$  years) are recruited in rural and urban Ghana, and in the cities of Amsterdam, Berlin and  
43 London. Ghanaians are one of the largest SSA migrant groups in Europe.<sup>34-36</sup> The 2009 estimates by  
44 the Office for National Statistics recorded 93,000 Ghanaian-born people living in the UK. The  
45 majority of Ghanaians in the UK are concentrated in London boroughs of Southwark, Lambeth,  
46 Newham, Hackney, Haringey, Lewisham, Croydon, Merton and Brent.<sup>34</sup> In Germany, 22,000 people  
47 are officially registered as Ghanaians the majority of whom are concentrated in Berlin, Hamburg and  
48 North-Rhine Westphalia.<sup>35</sup> In the Netherlands, in 2009 there were approximately 20,000 officially  
49 recorded Ghanaians. The majority of these are concentrated in southeast Amsterdam.<sup>36</sup>  
50  
51  
52

## 53 **Recruitment of the study participants**

### 54 *Engagement of Ghanaian community*

55  
56  
57  
58  
59  
60

1  
2  
3 Previous work in the Netherlands and a feasibility study among African communities in the UK show  
4 that involvement of the community leaders enhances study participation and may help prevent a low  
5 response rate relating to language barriers and lack of understanding about the relevance of the  
6 study.<sup>37-38</sup> The RODAM project therefore involves the Ghanaian community leaders in all sites. This  
7 include working with religious communities (e.g., churches, mosques), endorsement from local key  
8 figures, and establishing relationships with health care organisations that serve these groups. In  
9 addition, the project team provides information about the study via local media aim at the Ghanaian  
10 population (e.g., Ghanaian radio and TV stations).  
11

12  
13 Because of differences in the population registration systems across European countries as well as in  
14 Ghana, different approaches are needed for the recruitment of the study populations across locations.  
15 For example, there is a population register in the Netherlands where the Ghanaian migrants could be  
16 identified and randomly selected for the study. In Ghana, the UK and Germany, the situation is quite  
17 different as there are no population registers that will allow for these easy identification of these  
18 populations. It is important, however, to adopt the recruitment strategies that are as comparable as  
19 possible across locations. Below we describe the various recruitment strategies in each site..  
20  
21

#### 22 23 *Recruitment strategy in Ghana*

24  
25 In Ghana, two cities (Kumasi and Obuasi) and 15 villages in the Ashanti region are served as the  
26 urban and rural recruitment sites. The initial sampling frame was the list of enumeration areas in the  
27 Ashanti region from the 2010 census. A multistage random sampling procedure was adopted to arrive  
28 at the sampling of 30 Enumeration Areas (EAs). Enumeration areas were stratified, weighted and a  
29 random sample of rural and urban enumeration areas selected. There are over two thousand urban and  
30 more than 1000 rural EAs, respectively. The first stage was to group the districts into two main  
31 categories: districts with a high number of urban (Kumasi and Obuasi) and districts with a high  
32 number of rural EAs. The next stage of sampling was to put the EAs together in each of the categories  
33 and take a weighted random sample of 10 for Kumasi and 5 for Obuasi, respectively. The procedure  
34 was repeated for the rural EAs by adding all the EAs in the selected districts and weighted from the  
35 first stage together after which a simple random sample procedure was adopted to select the total  
36 number of rural EAs (15) required for the study. Letters are sent to all selected health and community  
37 authorities to notify them of the start of the study. We send team members to the various communities  
38 to stay among them. Once within the community, the team then organise mini clinics in the field for a  
39 period of 1-2 weeks depending on the sampled population and responsiveness of respondents.  
40  
41  
42  
43

#### 44 45 *Recruitment strategy in the Netherlands*

46  
47 In the Netherlands, Ghanaian subjects were randomly drawn from Amsterdam Municipal Health  
48 register. This register contains data on country of birth of citizens and their parents, thus allowing for  
49 sampling based on the Dutch standard indicator for ethnic origin. All selected subjects aged  $\geq 25$  years  
50 were sent a written invitation combined with written information regarding the study and a opting out  
51 response card. Participants are reminded by phone or home visit after 2 weeks if there is no response.  
52 After a positive response, an appointment for physical examination at a local health centre is made  
53 over the phone follow by a confirmation letter of the appointment and a digital or paper version of the  
54 questionnaire (depending on the preference of the subject) is sent to the subject's home address.  
55  
56  
57  
58  
59  
60



### *Recruitment strategy in the UK*

The UK has no population register for migrant groups. Consequently, Ghanaian organisations are served as the sampling frame. Lists of these organisations have been obtained from the Ghanaian Embassy and the Association of Ghanaian Churches in the UK in the boroughs known to have the greatest concentration of Ghanaians. Lists of all members of their organisations if available have also been requested, from which a number of all participants aged  $\geq 25$  years are invited to participate in the study. The selected subjects receive a written invitation combined with written information regarding the study and a opting out response card. Participants are sent a confirmation letter of the appointment for a physical examination at a local health centre, church or community centre, including a digital or paper version of the questionnaire (depending on the preference of the subject) if they agree to participate in the study.

### *Recruitment strategy in Germany*

In Berlin, a list of Ghanaian individuals (born in Ghana, or Ghanaian passport holders) was provided by the registration office and that was supplemented with contact details of members of Ghanaian organisations and churches in Berlin. From this combined list, all participants aged  $\geq 25$  years have been invited to participate in the study. In addition, a written invitation combined with written information regarding the study and a response card has been sent to the selected subjects. Participants are reminded after 2 weeks if there is no response. After a positive response, the participants are contacted by phone to schedule date and location of the interview with a trained research assistant or opt for the digital online version. Subsequent to the completion of the questionnaire, a date for physical examination is then scheduled.

### *Ethical approval*

Ethical approval of the study protocols has been requested at all sites from the respective ethics committees in Ghana (School of Medical Sciences/Komfo Anokye Teaching Hospital Committee on Human Research, Publication & Ethical Review Board), Netherlands (Institutional Review Board of the AMC, University of Amsterdam), Germany (Ethics Committee of Charite-Universitätsmedizin Berlin) and the UK (London School of Hygiene and Tropical Medicine Research Ethics Committee) before data collection began in each country. Informed written consent is also obtained from each participant prior to the enrolment in the study. In addition, an external independent Ethical advisor has been appointed by the RODAM Steering Committee to oversee the ethical issues in RODAM study.

### *Power and Data analysis*

In the presented study we aim to sample 6,250 individuals comprising five subgroups of 1,250 each from the 5 locations. For phenotypic, genetic and epigenetic studies subsets are selected. In order to estimate the statistical power with regard to different sample sizes in the three types of data we evaluated three distinct types of statistical power calculations with regard to the type of survey.

Phenotypic association: For the phenotypic association analysis we assumed a prevalence of T2D of  $< 5\%$  in rural Ghana,  $6-7\%$  in urban Ghana and  $> 12\%$  in Europe.<sup>32,39</sup> For obesity we assumed a prevalence of  $< 5\%$  in rural Ghana,  $17\%$  in urban Ghana, and  $30\%$  in Europe.<sup>2,39</sup> In general, we aim for a power of 0.90 with  $\alpha=0.05$  (incl. Bonferroni correction). Using these parameters a sample size of approximately 1230 is needed in the rural Ghana, urban Ghana, Amsterdam, London and Berlin subsets to detect a difference between the group proportions of 5%. T2D was defined as fasting



1  
2  
3 plasma glucose  $\geq 7$  mmol/L, or pre-existing anti-diabetic medication or HbA1c  $\geq 6.5\%$ .<sup>40</sup> Generalised  
4 obesity was defined as body mass index  $\geq 30.0$  kg/m<sup>2</sup>, and central obesity as a waist circumferences  
5  $>102$  cm in males or  $>88$  cm in females.<sup>41-42</sup>  
6

7 Genetic association: The present study aims to genotype a substantial part of the total sample among  
8 diabetics (cases) and non-diabetes (controls). The genotyping will be based on a standard SNP array  
9 platform suitable for performing genome wide association study (GWAS) as well as candidate gene  
10 analysis or related approaches. Using the statistical power calculator on binary traits for a case –  
11 control study design (S. Purcell; <http://pngu.mgh.harvard.edu/>), assuming an allele frequency of 0.25,  
12 a prevalence of 16%, a relative risk of 1.3 and 1.6 (Aa and AA rep.), a D' prime of 1, the number of  
13 cases of 1000 (1:2 case control ratio) and a type I error rate of 0.05, approximately 540 cases are  
14 considered sufficient to obtain a power of 0.90. Although the latter necessary sample size is covered  
15 by our study, it should be noted that correction for multiple tests, i.e. if more than one genetic variant  
16 is tested, is not considered here. Nevertheless, candidate gene or related association approaches within  
17 this single study setup have sufficient statistical power to detect moderate and low effect sizes.  
18  
19

20  
21 Epigenetic association: To explore the influence of epigenetic factors on the main outcomes, we will  
22 first assess the differences in methylation levels among Ghanaians living in rural-Ghana, urban and  
23 Europe and their relative contributions to the differences to obesity and T2D that may be observed.  
24 With study power of 0.80 and  $\alpha=0.05$  (and SD  $\pm 0.10\%$ ), at least 64 people per group are needed to  
25 detect a mean percentage difference in methylation density of 5%. When multiple correction is taken  
26 into account, about 300 individuals per group (i.e. 900) participants are needed. Epigenome-wide  
27 analysis (EWA) will be performed. Association analysis of the DNA-methylation profiles and obesity  
28 and T2D and related phenotypes will subsequently be performed. Promising loci will then be validated  
29 using next generation bisulphite sequencing.  
30  
31

32  
33 Simple tables, proportions, mean and median values will be used to examine the data. Multivariable  
34 linear and logistics regression analyses will be used to assess the differences and to identify specific  
35 relevant factors and their relative contribution to the differences in body indices and fasting glucose  
36 (both continuous and binary traits) between Ghanaian migrants and non-migrants.  
37  
38

### 39 **Data collection**

40  
41 Data collection is composed of questionnaire/interviews, physical examination and biological samples.  
42 The methods for data collection in RODAM are identical in all locations following standard operating  
43 procedures and applying standardised tools. Questionnaires have been adapted to the local  
44 circumstances in Ghana, Netherlands, UK, and Germany where needed. For example, for all sites  
45 modification of questions with respect to educational system or social security system were made.  
46 Before data collection, a two-day training course in the Netherlands was organised for all those  
47 involved in data collection, on the overall project's procedures. The training involved the  
48 administration of the different questionnaires, physical examinations, processing of blood and urine  
49 samples in the laboratory and transport and storage of samples. The work package leaders, in turn,  
50 train all recruitment team members in each site on all aspects of study. Interviewers are recruited  
51 among Ghanaian-speaking residents in Europe, are introduced to the aims and procedures of the study,  
52 and are instructed and trained on the use of the questionnaires. Research assistants also receive the on-  
53 line tutorial for the Oracle Clinical data entry system. The performance of each interviewer or research  
54 assistant is monitored during the initial interviews and physical examinations. Feedback is provided  
55  
56  
57  
58  
59  
60

and changes initiated if needed. The RODAM coordinator monitors data collection at all study sites to ensure standardisation of methods.

### Questionnaire/interviews

All the participants who agree to participate in the study receive an appointment for a structured interview. The interviews are conducted by trained interviewers of Ghanaian background and last for about 60-120 minutes. To increase participation rate, the participants are given a range of options including interviews in participants' homes, digital or paper version of the questionnaire depending on the preference of the participant. The interviewers conduct the interviews in the preferred language of the respondent either in English, German, Dutch or Ghanaian languages. The interview is based on a structured health questionnaire, and contains questions on demographics (age, sex, marital status, household composition, religion), socio-economic position (education level and parental education, employment status and parental employment status, occupational status and wealth), migration related factors (pre-migration history, age at first migration, age at arrival in current location, duration of residence, cultural distance and ethnic identity), psychosocial vulnerability (perceived discrimination, social support, mastery, recent negative life events and current depression), health status (self-reported general health and presence and history of diseases, family history of diseases), health care use (visit to GP, specialists, psychological care, alternative health care) and health behaviour (e.g. dietary behaviour, physical activity, alcohol and smoking, perceived body weight and body shape and adherence to medications) by using appropriate validated instruments (Table 1). For example, physical activity is measured using the WHO Global Physical Activity Questionnaire (GPAQ) version 2.<sup>43</sup> Dietary behaviour is determined by a Food Propensity Questionnaire (FPQ), specifically developed in RODAM to include Ghana-specific foods. In addition, a 24 hour dietary recall questionnaire will be administered to a subset of the study population in each site (n=5\*100).

**Table 1: Variables measured in the RODAM questionnaire**

| Themes                              | Variable/Measure                                                                                                                                                                                                                                                                    | Questionnaire instrument/measures                                                                                                                                                                                                                                                                                                                                        |
|-------------------------------------|-------------------------------------------------------------------------------------------------------------------------------------------------------------------------------------------------------------------------------------------------------------------------------------|--------------------------------------------------------------------------------------------------------------------------------------------------------------------------------------------------------------------------------------------------------------------------------------------------------------------------------------------------------------------------|
| Demographics                        | Age, sex, marital status, religion, tribe, locality                                                                                                                                                                                                                                 | -                                                                                                                                                                                                                                                                                                                                                                        |
| Socioeconomic status                | <ol style="list-style-type: none"> <li>1. Education</li> <li>2. Employment status</li> <li>3. Wealth</li> <li>4. Parental socio-economic status</li> </ol>                                                                                                                          | <ol style="list-style-type: none"> <li>1. Education attainment</li> <li>2. Nature of work</li> <li>3. Household index; Wealth index (only in Ghana)</li> <li>4. Father and mother education attainment and profession</li> </ol>                                                                                                                                         |
| Migration related factors           | Generation, duration of residence in Europe, religion, cultural distance, migration history                                                                                                                                                                                         | -                                                                                                                                                                                                                                                                                                                                                                        |
| Health status                       | <ol style="list-style-type: none"> <li>1. General health</li> <li>2. Presence and history of diseases and family history of diseases</li> </ol>                                                                                                                                     | <ol style="list-style-type: none"> <li>1. SF-12<sup>44</sup></li> <li>2. Various health conditions</li> </ol>                                                                                                                                                                                                                                                            |
| Psychosocial factors                | <ol style="list-style-type: none"> <li>1. Perceived discrimination</li> <li>2. Perceived social support</li> <li>3. Dealing with everyday problems</li> <li>4. Recent experiences (stressful life events)</li> <li>5. Psychological stress</li> <li>6. Recent well-being</li> </ol> | <ol style="list-style-type: none"> <li>1. Everyday Discrimination Scale<sup>45</sup></li> <li>2. SSQT Satisfaction Emotional Support subscale<sup>46</sup></li> <li>3. Mastery<sup>47</sup></li> <li>4. List of Threatening Experiences<sup>48</sup></li> <li>5. 2 items from INTERHEART<sup>49</sup></li> <li>6. Patient Health Questionnaire-9<sup>50</sup></li> </ol> |
| Health care use and related factors | Visits to GP, specialists, psychological care, alternative health care                                                                                                                                                                                                              | Last four weeks                                                                                                                                                                                                                                                                                                                                                          |

| Health behaviour |                                      |                                                                              |
|------------------|--------------------------------------|------------------------------------------------------------------------------|
| 1.               | Smoking                              | 1. -                                                                         |
| 2.               | Alcohol intake                       | 2. -                                                                         |
| 3.               | Physical activity                    | 3. WHO Global Physical Activity Questionnaire (GPAQ) version 2 <sup>43</sup> |
| 4.               | Dietary behaviour                    | 4. Ghana specific FPQ, 24h dietary recalls for sub-sample (n=5*100)          |
| 5.               | Perceived body weight and body shape | 5. Pulvers Instrument to measure body image <sup>51</sup>                    |
| 6.               | Adherence to medication              | 6. Self-reported adherence <sup>52</sup>                                     |

All participants who complete the questionnaire are invited for physical examination in the local research clinic or in a health centre. At the start of the visit, the study and the procedures involved are explained to each participant and informed consent is signed if not already done so at home. After informed consent is given, physical measurements are made and biological samples, fasting blood and urine samples are collected.

### Physical measurements

Physical examinations are performed with validated devices according to standardised operational procedures. Physical examinations comprise assessment of anthropometrics (weight, height, trunk, waist circumference and hip circumference), Bioimpedance Analysis (BIA), blood pressure and ankle-arm-index measures (Table 2). The portable stadiometer SECA 217 is used for height measurement, the SECA 877 for weight measurement, measuring tape for abdominal and hip circumference and BODYSTAT<sup>®</sup> 1500 MDD analyzer for BIA. Blood pressure is measured three times using validated semi-automated device (The Microlife<sup>®</sup> WatchBP<sup>®</sup> home) with appropriate cuffs in a sitting position after at least five minute rest. Ankle-Brachial-Index (ABI) is measured with The Microlife<sup>®</sup> WatchBP Office ABI with appropriate cuffs in a supine position after at least ten minutes rest. Each participant receives a summary of his/her main results accompanied by an explanation and the recommendation to contact his/her General Practitioner (GP) if the results are abnormal.

**Table 2: Physical examination variables measured in the RODAM**

| Themes               | Measures                                                                                                                 | Instrument                                                                                                                 |
|----------------------|--------------------------------------------------------------------------------------------------------------------------|----------------------------------------------------------------------------------------------------------------------------|
| Anthropometrics      | 1. Weight<br>2. Height & Trunk<br>3. waist circumference<br>4. Hip circumference<br>5. Body fat (Bio Impedance Analysis) | 1. SECA 877<br>2. SECA 217<br>3. Measuring tape<br>4. Measuring tape<br>5. BODYSTAT <sup>®</sup> 1500 MDD analyzer for BIA |
| Blood pressure       | Systolic and diastolic blood pressure, measured 3 times in a sitting position after at least 5 minutes rest              | The Microlife <sup>®</sup> WatchBP <sup>®</sup> home                                                                       |
| Ankle-Brachial-Index | Ankle-Brachial-Index, measured in a supine position after at least ten minute rest                                       | The Microlife <sup>®</sup> WatchBP Office ABI                                                                              |

### Biological material

#### *Blood samples*

Fasting venous blood samples are collected by trained research assistants in all sites. All blood samples are manually processed and aliquoted immediately after collection by a trained technician or research assistant according to standard operational procedures, and then temporarily stored at the

1  
2  
3 local research location. Immediate processing and cryopreservation at the research location has the  
4 advantage of preserving any highly labile molecules in the samples. Standardized procedures ensure  
5 that each sample is collected, handled, processed, transported, and stored in the same way across sites.  
6 The samples are then transported to the respective local laboratories (Durrer Center for Cardiogenetic  
7 Research at the AMC, Amsterdam; Kwame Nkrumah University of Science and Technology, KCCR,  
8 Kumasi, Faculty of Infectious and Tropical Diseases, LSHTM, London & Institute of Tropical  
9 Medicine and International Health, Berlin) where samples are checked, registered, and stored at -80°C.  
10 These samples include EDTA whole blood, heparin plasma and serum. In addition, on the spot, fasting  
11 plasma glucose level is assessed by validated hand held device (Accu-Chek Performa meter + Accu-  
12 Chek Inform II test strip (Roche, Germany) in all sites to provide accurate glucose determination as  
13 blood glucose concentration tends to decline over time in blood samples.<sup>53</sup>  
14  
15

#### 16 17 *Morning urine sample*

18 Participants are asked to bring the first early morning urine in a clean jar. The urine sample is tested  
19 with a dipstick in the Urysis 1100 (Combur 7, Roche) on the spot, to determine pH, glucose, ketones,  
20 leucocytes, nitrite, protein and erythrocytes. One sample per participant is transported, together with  
21 the blood samples, to respective local laboratory and stored at -80°C.  
22  
23

#### 24 *Transfer of biological material to dedicated centres for biochemical analyses and genotyping*

25 From the local research centres the two aliquoted samples, one urine sample and a 2 ml EDTA are  
26 then transported to Berlin for biochemical analyses including glucose metabolism (fasting glucose,  
27 HbA1c, insulin), lipid profile (total cholesterol, HDL-cholesterol, LDL-cholesterol and triglycerides),  
28 electrolytes and renal function (creatinine, albumin, sodium, potassium, calcium), uric acid  
29 metabolism (uric acid), liver metabolism (alanine transaminase (ALT), aspartate aminotransferase  
30 (AST), gamma-glutamyl transpeptidase (GGT)), oxidative status and iron metabolism (ferritin) and  
31 inflammation (hsCRP); and a 4 ml EDTA whole blood sample was transported to Nottingham for  
32 DNA extraction and genotyping. Shipping of the samples from European sites is done using styrofoam  
33 boxes filled with dry ice and from Ghana in dry shippers filled with liquid nitrogen. Numerous factors  
34 including temperature, packaging, courier, sample type, import/export requirements, seasons, costs,  
35 and transit time/ship days can affect biological specimen integrity during transportation both  
36 domestically and internationally. Hence, staff involved with shipping the specimens has been trained  
37 in order to minimise factors that might affect the integrity of the specimens. In addition, training  
38 regarding legal or regulatory aspects of shipment of specimens such as Material Transfer Agreement  
39 (MTA) has been given. Each centre maintains a shipment log to record the receipt and dissemination  
40 of shipments sent from the centre. Each shipment entry is given a unique shipment number.  
41  
42  
43  
44  
45  
46

#### 47 **Qualitative interviews of perception and knowledge of obesity and T2D**

48 Interventions to reduce obesity and T2D have often been ineffective particularly in migrant  
49 populations.<sup>28</sup> This may, in part, relate to poor perceptions and knowledge about both conditions.  
50 Access to preventive and curative services may depend on a wide range of factors including  
51 knowledge of services and how to use them, health beliefs and attitudes, language barriers, the  
52 sensitivity of services to differing needs and the quality of care provided. Gaining in-depth insight into  
53 these factors requires qualitative methodology. Thirty-two individual interviews with people with  
54 diabetes and 8 focus groups (including up to 8 participants per group) with lay healthy individuals will  
55  
56  
57  
58  
59  
60

1  
2  
3 be held at each location. Segmentation categories for purposive sampling for people with diabetes are  
4 gender, duration of diabetes, BMI status and age. Each individual interview and focus group interview  
5 is conducted by trained interviewers using the same themes across all sites and had duration of 60-90  
6 minutes. Interviews are recorded, transcribed and analysed using qualitative data software. A coding  
7 framework of themes is developed based on the RODAM theoretical framework and social  
8 representations theory.<sup>54,55</sup> Coding is done inductively and deductively through a constant comparative  
9 approach. All transcripts are coded separately by two independent researchers and systematically  
10 discussed and compared for inter-rater reliability.  
11  
12

## 13 14 15 **Discussion**

16  
17  
18 SSA migrants to Europe belong to one of the fastest growing migrant groups in Europe today.<sup>56</sup> The  
19 unprecedented high levels of cardiovascular diseases and related risk factors, such as obesity and T2D,  
20 have huge clinical care and public health implications. Consequently, the need to get detailed insights  
21 into the possible underlying determinants of obesity and T2D and related complications to help  
22 support the preventive efforts as well as clinical management is increasingly being recognised. This is  
23 particularly so in major European cities where some of these populations form a major part of the  
24 patient population.<sup>31</sup> Simultaneously, African countries are facing huge challenges regarding obesity  
25 and T2D and related complications.<sup>7,9</sup> This issue was recently highlighted in the meeting of the general  
26 assembly of the UN on Non-Communicable Diseases in 2011 as an important epidemic of our times:  
27 (<http://www.un.org/en/ga/president/65/issues/ncdiseases.shtml>). Unfortunately, the established health  
28 education and lifestyle interventions mainly in the European host populations may not be applied in  
29 migrant populations and other world regions such as Africa because of differences in susceptibility,  
30 nutrition, social circumstances and culture. Still, both in Africa and among African migrants, data are  
31 highly fragmentary and based on heterogeneous populations. Consequently, the magnitude of the  
32 problem is uncertain and the relative contribution of risk factors is undefined. Thus, it is difficult to set  
33 rational priorities for targeted health interventions and policies, and to monitor progress towards set  
34 goals. Knowledge on health-related outcomes that are directly associated with the migration process  
35 will allow for the most effective and appropriate use of interventions, efforts and investments to  
36 improve and promote the health of these populations.<sup>51</sup>  
37  
38  
39

40  
41 Comparative studies such as RODAM have an enormous potential for both migrant populations and  
42 for the countries from which they have migrated from. For migrant populations, it provides indications  
43 of how exposure to different environmental circumstances might influence health outcomes. This is  
44 highly relevant in that the industrialised countries themselves differ greatly in terms of opportunities  
45 for socio-economic development of the migrant groups, race relations, and access to health care and  
46 preventive services.<sup>57</sup> These differential contexts can undoubtedly influence health behaviour and  
47 health care use among migrant groups, and subsequently lead to differences in health outcomes  
48 between similar migrant populations living in different countries.<sup>30,32</sup> For the countries of origin, the  
49 rapid increases of obesity and T2D following migration to high-income countries give a clear  
50 indication of the vulnerability of the population left behind as many of these countries continue to  
51 westernise.<sup>57</sup>  
52  
53

54  
55 The high prevalence of obesity and T2D among migrant groups obviously is a result of a multitude of  
56 different factors. Thorough understanding of the factors is a prerequisite for efficient intervention and  
57 prevention. The rigorous characterisation of biochemical parameters and specific environmental  
58  
59  
60

1  
2  
3 factors as well as epigenetic factors will allow comparing the major pathophysiological aspects of  
4 obesity and T2D between African migrants and their compatriots who did not migrate. Epigenetic data  
5 have a huge potential to point to, as yet, unrecognised pathophysiological pathways in obesity and  
6 T2D, and thus reveal options for improved diagnosis and treatment.  
7

8  
9 The RODAM project will deliver up-to-date data on obesity and T2D among SSA migrants in Europe  
10 and their home country. This will allow us to draw conclusions on the magnitude of the problem and  
11 deduce the attributable risk of migration from rural to urban environment as well as migration to  
12 Europe for obesity and T2D. Our findings on the influence of migration (from Africa to Europe) will  
13 help health care providers and health policy stakeholders to better understand and predict comparable  
14 developments in other African populations and in other parts of the world; and to (re)direct efforts to  
15 the most obvious changes induced by migration that affect obesity and diabetes.  
16  
17  
18  
19  
20  
21  
22  
23  
24  
25  
26  
27  
28  
29  
30  
31  
32  
33  
34  
35  
36  
37  
38  
39  
40  
41  
42  
43  
44  
45  
46  
47  
48  
49  
50  
51  
52  
53  
54  
55  
56  
57  
58  
59  
60



**Acknowledgement**

We are very grateful to the advisory board members for their valuable support in shaping the methods, and to the Ghanaian volunteers participating in this project.

**Funding statement:**

This work was supported by the European Commission under the Framework programme (Project Number: 278901).

**Authors' contributions**

CA, EO, AGA, LS, JA, FM, ID, MBS, JS, KG, SB, AZ, AK & KS developed the origin grant proposal. CA, EB & KM prepared the first draft with the support of all authors. All authors read and approved the final manuscript.

**Competing interests**

None

**Data Sharing Statement**

N/A

## References

1. Misra A, Ganda OP. Migration and its impact on adiposity and type 2 diabetes. *Nutrition* 2007;23:696-708.
2. Agyemang C, Owusu-Dabo E, de Jonge A, Martins D, Ogedegbe G, Stronks K. Overweight and obesity among Ghanaian residents in The Netherlands: how do they weigh against their urban and rural counterparts in Ghana? *Public Health Nutr* 2009;12:909-16.
3. Agyemang C, Addo J, Bhopal R, de-Graft Aikins A, Stronks K. Cardiovascular disease, diabetes and established risk factors among populations of sub-Saharan African descent in Europe: a literature review. *Global Health* 2009;5:7.
4. Oldroyd J, Banerjee M, Heald A, Cruickshank K. Diabetes and ethnic minorities. *Postgrad Med J* 2005; 81:486-490.
5. Gill PS, Kai J, Bhopal RS, Wild S. Health Care Needs Assessment: Black and Minority Ethnic Groups. In: Raftery J (ed). *Health Care Needs Assessment. The epidemiologically based needs assessment reviews. Third Series*. Abingdon: Radcliffe Medical Press Ltd.
6. Health Survey for England 2004: Health of Ethnic Minorities. [[http://www.ic.nhs.uk/webfiles/publications/hlthsvyeng2004ethnic/HealthSurveyForEngland161205\\_PDF%20.pdf](http://www.ic.nhs.uk/webfiles/publications/hlthsvyeng2004ethnic/HealthSurveyForEngland161205_PDF%20.pdf)]
7. Abubakari AR, Bhopal RS. Systematic review on the prevalence of diabetes, overweight/obesity and physical inactivity in Ghanaians and Nigerians. *Public Health* 2008;122:173-82
8. Amoah AG, Owusu SK, Adjei S. Diabetes in Ghana: a community based prevalence study in Greater Accra. *Diabetes Res Clin Pract* 2002;56:197-205.
9. Abubakari AR, Lauder W, Agyemang C, Jones M, Kirk A, Bhopal RS. Prevalence and time trends in obesity among adult West African populations: a meta-analysis. *Obes Rev* 2008;9:297-311.
10. Amoah AG. Sociodemographic variations in obesity among Ghanaian adults. *Public Health Nutr*. 2003;6(8):751-7.
11. International Diabetes Federation. *Diabetes Atlas*. 5th ed. Brussels, Belgium, International Diabetes Federation, 2011
12. Hossain P, Kowar B, El Nahas M. Obesity and diabetes in the developing world--a growing challenge. *N Engl J Med*. 2007;356(3):213-5.
13. Karter AJ, Ferrara A, Liu JY, Moffet HH, Ackerson LM, Selby JV. Ethnic disparities in diabetic complications in an insured population. *JAMA* 2002;287:2519-27.
14. Staiger H, Machicao F, Fritsche A, Häring HU. Pathomechanisms of type 2 diabetes genes. *Endocr Rev*. 2009;30(6):557-85.
15. Freeman H, Cox RD. Type-2 diabetes: a cocktail of genetic discovery. *Hum Mol Genet* 2006;15:202-9.
16. Warner MJ, Ozanne SE. Mechanisms involved in the developmental programming of adulthood disease. *Biochem J*. 2010;427:333-47.
17. Hales CN, Barker DJ. Type 2 (non-insulin-dependent) diabetes mellitus: the thrifty phenotype hypothesis. *Diabetologia* 1992;35:595-601.
18. Van Speybroeck L. From epigenesis to epigenetics: the case of C. H. Waddington. *Ann N Y Acad Sci* 2002;981:61-81.
19. Plagemann A, Harder T, Brunn M, Harder A, Roepke K, Wittrock-Staar M, Ziska T, Schellong K, Rodekamp E, Melchior K, Dudenhausen JW. Hypothalamic POMC promoter methylation becomes altered by early overfeeding: An epigenetic model of obesity and the metabolic syndrome. *J Physiol* 2009; 15;587(Pt 20):4963-76.

- 1
- 2
- 3 20. Prentice AM. Early influences on human energy regulation: thrifty genotypes and thrifty
- 4 phenotypes. *Physiol Behav* 2005;86(5):640-5.
- 5
- 6 21. Tobi EW, Lumey LH, Talens RP, Kremer D, Putter H, Stein AD, Slagboom PE, Heijmans BT.
- 7 DANN methylation differences after exposure to prenatal famine are common and timing- and
- 8 sex-specific. *Hum Mol Genet* 2009;18:4046-4053.
- 9
- 10 22. Rock, Melanie. Sweet Blood and Social Suffering: Rethinking Cause-Effect Relationships in
- 11 Diabetes, Distress and Duress. *Medical Anthropology* 2003;22:131-174.
- 12
- 13 23. Manson JE, Nathan DM, Krolewski AS, Stampfer MJ, Willett WC, Hennekens CH. A prospective
- 14 study of exercise and incidence of diabetes among US male physicians. *JAMA* 1992; 268:63-7.
- 15
- 16 24. Williamson DF, Madans J, Anda RF, Kleinman JC, Kahn HS, Byers T. Recreational physical
- 17 activity and ten-year weight change in a US national cohort. *Int J Obes Relat Metab Disord* 1993;
- 18 17:279.
- 19
- 20 25. Hamman RF. Genetic and environmental determinants of non-insulin-dependent diabetes mellitus
- 21 (NIDDM). *Diabetes Metab Rev* 1992;8:287-338.
- 22
- 23 26. Miller WC; Koceja DM; Hamilton EJ A meta-analysis of the past 25 years of weight loss research
- 24 using diet, exercise or diet plus exercise intervention. *Int J Obes Relat Metab Disord* 1997;
- 25 21:941-7.
- 26
- 27 27. Tuomilehto J, Lindström J, Eriksson JG, Valle TT, Hämäläinen H, Ilanne-Parikka P, Keinänen-
- 28 Kiukaanniemi S, Laakso M, Louheranta A, Rastas M, Salminen V, Uusitupa M; Finnish Diabetes
- 29 Prevention Study Group. Prevention of type 2 diabetes mellitus by changes in lifestyle among
- 30 subjects with impaired glucose tolerance. *N Engl J Med* 2001; 344:1343-50.
- 31
- 32 28. Uitewaal PJ, Voorham AJ, Bruijnzeels MA, Berghout A, Bernsen RM, Trienekens PH, Hoes AW,
- 33 Thomas S. No clear effect of diabetes education on glycaemic control for Turkish type 2 diabetes
- 34 patients: a controlled experiment in general practice. *Neth J Med.* 2005;63:428-34.
- 35
- 36 29. Scott P, Rajan L. Eating habits and reactions to dietary advice among two generations of
- 37 Caribbean people: a South London study, part 2. *Practical Diabetes International* 2000;17:213-
- 38 216.
- 39
- 40 30. Agyemang C, Kunst AE, Stronks K. Ethnic inequalities in health: does it matter where you have
- 41 migrated to? *Ethn Health.* 2010;15(3):216-8.
- 42
- 43 31. Fernades A, Miguel JP. *Health and migration in the European union: better health for all in an*
- 44 *inclusive society*. Lisbon: Instituto Nacional de Saúde Doutor Ricardo Jorge. 2009.
- 45
- 46 32. Agyemang C, Kunst AE, Bhopal R, Anujoo K, Zaninotto P, Nazroo J, Nicolaou M, Unwin N, van
- 47 Valkengoed I, Redekop WK, Stronks K. Diabetes prevalence in populations of South Asian Indian
- 48 and African origins: a comparison of England and the Netherlands. *Epidemiology.* 2011;22:563-7.
- 49
- 50 33. World Health Organization (WHO). Health of migrants - the way forward. Report of a global
- 51 consultation. Madrid, 2010.
- 52
- 53 34. Office for National Statistics. Estimated population resident in the United Kingdom, by foreign
- 54 country of birth (Table 1.3) <http://www.statistics.gov.uk/default.asp> [accessed 08 July 2010].
- 55 London, 2009.
- 56
- 57 35. German Technical Cooperation (GTZ). Die ghanaische Diaspora in Deutschland - Ihr Beitrag zur
- 58 Entwicklung Ghanas. Eschborn, 2009.
- 59
- 60 36. Central Bureau for Statistics (2009) Statistical yearbook 2009. Statistics Netherlands Facility
- Services. Henri Faasdreef 312, 2492 JP, The Hague.
37. Elam G, Chinouya M, Nazroo J. Feasibility study for health surveys among black African people
- living in England Final report - implications for the Health Survey for England 2003. London:
- Joint Health Surveys Unit National Centre for Social Research, 2001.

- 1  
2  
3 38. Agyemang C, Nicolaou M, Boateng L, Dijkshoorn H, van de Born BJ, Stronks K. Prevalence,  
4 awareness, treatment, and control of hypertension among Ghanaian population in Amsterdam, the  
5 Netherlands: the GHAIA study. *Eur J Prev Cardiol.* 2013;20:938-46.  
6  
7 39. Nicolaou M, Kunst AE, Busschers WB, van Valkengoed IG, Dijkshoorn H, Boateng L, Brewster  
8 LM, Snijder MB, Stronks K, Agyemang C. Differences in Body Fat Distribution Play a Role in the  
9 Lower Levels of Elevated Fasting Glucose amongst Ghanaian Migrant Women Compared to  
10 Men. *PLoS One.* 2013;8:e66516.  
11  
12 40. American Diabetes Association. Diagnosis and classification of diabetes mellitus. *Diabetes Care.*  
13 2010 Jan;33 Suppl 1:S62-9.  
14  
15 41. Obesity: preventing and managing the global epidemic. Report of a WHO consultation. *World*  
16 *Health Organ Tech Rep Ser* 2000; 894:i.  
17  
18 42. Clinical Guidelines on the Identification, Evaluation, and Treatment of Overweight and Obesity in  
19 Adults--The Evidence Report. National Institutes of Health. *Obes Res* 1998; 6 Suppl 2:51S.  
20  
21 43. Bull FC, Maslin TS, Armstrong T. Global physical activity questionnaire (GPAQ): nine country  
22 reliability and validity study. *J Phys Act Health.* 2009;6:790-804.  
23  
24 44. Larson CO, Schlundt D, Patel K, Beard K, Hargreaves M. Validity of the SF-12 for use in a low-  
25 income African American community-based research initiative (REACH 2010). *Prev Chronic Dis.*  
26 2008;5:A44  
27  
28 45. Williams DR, Yan Yu, Jackson JS, Anderson NB. Racial Differences in Physical and Mental  
29 Health: Socio-economic Status, Stress and Discrimination. *J Health Psychol.* 1997;2:335-51.  
30  
31 46. Suurmeijer TP, Doeglas DM, Briançon S, Krijnen WP, Krol B, Sanderman R, Moum T, Bjelle A,  
32 Van Den Heuvel WJ. The measurement of social support in the 'European Research on  
33 Incapacitating Diseases and Social Support': the development of the Social Support Questionnaire  
34 for Transactions (SSQT). *Soc Sci Med.* 1995;40:1221-9.  
35  
36 47. Pearlin LI, Schooler C. The structure of coping. *J Health and Social Behavior* 1978;19:2-21  
37  
38 48. Brugha TS, Cragg D. The List of Threatening Experiences: the reliability and validity of a brief  
39 life events questionnaire. *Acta Psychiatr Scand* 1990; 82: 77-81.  
40  
41 49. Yusuf S, Hawken S, Ounpuu S, Dans T, Avezum A, Lanas F, McQueen M, Budaj A, Pais P,  
42 Varigos J, Lisheng L; INTERHEART Study Investigators. Effect of potentially modifiable risk  
43 factors associated with myocardial infarction in 52 countries (the INTERHEART study): case-  
44 control study. *Lancet.* 2004;364(9438):937-52.  
45  
46 50. Kroenke Spitzer RL, Williams JB, Löwe B. The Patient Health Questionnaire Somatic, Anxiety  
47 and Depressive Symptom Scales: a systematic review. *General Hospital Psychiatry* 2010;32:  
48 3445-359  
49  
50 51. Pulvers KM, Lee RE, Kaur H, Mayo MS, Fitzgibbon ML, Jeffries SK, Butler J, Hou Q, Ahluwalia  
51 JS. Development of a culturally relevant body image instrument among urban African Americans.  
52 *Obes Res.* 2004;12:1641-51.  
53  
54 52. Nieuwkerk PT, de Boer-van der Kolk IM, Prins JM, Locadia M, Sprangers MA. Self-reported  
55 adherence is more predictive of virological treatment response among patients with a lower  
56 tendency towards socially desirable responding. *Antivir Ther.* 2010;15:913-6.  
57  
58 53. Chan A, Cockram C, Swaminathan R. Effect of delay in separating plasma for glucose  
59 measurement upon the interpretation of oral glucose tolerance tests. *Ann Clin Biochem*  
60 1990;27:73-4.  
54  
55 54. Moscovici S. The phenomenon of social representations. In: Farr RM, Moscovici S (Eds.), *Social*  
56 *representations.* Cambridge: Cambridge University Press, 1984.

- 1
- 2
- 3 55. de-Graft Aikins, A. (2005). Healer-shopping in Africa: new evidence from a rural-urban
- 4 qualitative study of Ghanaian diabetes experiences. *BMJ* 2005;331:737
- 5
- 6 56. Organization for Economic Cooperation and Development. Table A.1.1. Inflows of Foreign
- 7 Population into Selected OECD Countries. International Migration Outlook. Sopemi, 2006.
- 8
- 9 57. Agyemang C, de-Graft Aikins A, Bhopal R. Ethnicity and cardiovascular health research: pushing
- 10 the boundaries by including comparison populations in the countries of origin. *Ethn Health*
- 11 2012;17:579-96.
- 12
- 13
- 14
- 15
- 16
- 17
- 18
- 19
- 20
- 21
- 22
- 23
- 24
- 25
- 26
- 27
- 28
- 29
- 30
- 31
- 32
- 33
- 34
- 35
- 36
- 37
- 38
- 39
- 40
- 41
- 42
- 43
- 44
- 45
- 46
- 47
- 48
- 49
- 50
- 51
- 52
- 53
- 54
- 55
- 56
- 57
- 58
- 59
- 60

For peer review only

1  
2  
3  
4  
5  
6  
7  
8  
9  
10  
11  
12  
13  
14  
15  
16  
17  
18  
19  
20  
21  
22  
23  
24  
25  
26  
27  
28  
29  
30  
31  
32  
33  
34  
35  
36  
37  
38  
39  
40  
41  
42  
43  
44  
45  
46  
47  
48  
49  
50  
51  
52  
53  
54  
55  
56  
57  
58  
59  
60

Figure 1: A conceptual model for the RODAM project.

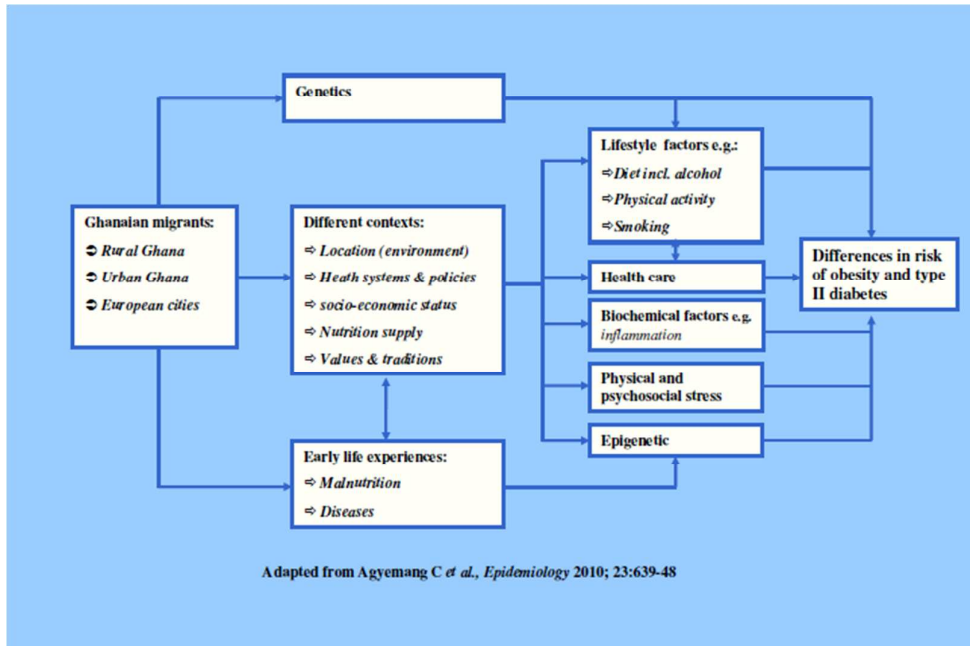

er review only



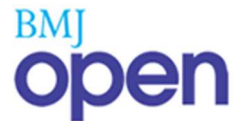

**Rational and cross-sectional study design of the Research on Obesity and Type 2 Diabetes among African Migrants: The RODAM study**

|                               |                                                                                                                                                                                                                                                                                                                                                                                                                                                                                                                                                                                                                                                                                                                                                                                                                                                                                                                                                                                                                                                                                                                                                                                                                                                                                                                                                                                                                                                                                                                                                                                                                                                                                                                                                                                                                                                                                                                                                                                                                                                                                                                                               |
|-------------------------------|-----------------------------------------------------------------------------------------------------------------------------------------------------------------------------------------------------------------------------------------------------------------------------------------------------------------------------------------------------------------------------------------------------------------------------------------------------------------------------------------------------------------------------------------------------------------------------------------------------------------------------------------------------------------------------------------------------------------------------------------------------------------------------------------------------------------------------------------------------------------------------------------------------------------------------------------------------------------------------------------------------------------------------------------------------------------------------------------------------------------------------------------------------------------------------------------------------------------------------------------------------------------------------------------------------------------------------------------------------------------------------------------------------------------------------------------------------------------------------------------------------------------------------------------------------------------------------------------------------------------------------------------------------------------------------------------------------------------------------------------------------------------------------------------------------------------------------------------------------------------------------------------------------------------------------------------------------------------------------------------------------------------------------------------------------------------------------------------------------------------------------------------------|
| Journal:                      | <i>BMJ Open</i>                                                                                                                                                                                                                                                                                                                                                                                                                                                                                                                                                                                                                                                                                                                                                                                                                                                                                                                                                                                                                                                                                                                                                                                                                                                                                                                                                                                                                                                                                                                                                                                                                                                                                                                                                                                                                                                                                                                                                                                                                                                                                                                               |
| Manuscript ID:                | bmjopen-2014-004877.R1                                                                                                                                                                                                                                                                                                                                                                                                                                                                                                                                                                                                                                                                                                                                                                                                                                                                                                                                                                                                                                                                                                                                                                                                                                                                                                                                                                                                                                                                                                                                                                                                                                                                                                                                                                                                                                                                                                                                                                                                                                                                                                                        |
| Article Type:                 | Protocol                                                                                                                                                                                                                                                                                                                                                                                                                                                                                                                                                                                                                                                                                                                                                                                                                                                                                                                                                                                                                                                                                                                                                                                                                                                                                                                                                                                                                                                                                                                                                                                                                                                                                                                                                                                                                                                                                                                                                                                                                                                                                                                                      |
| Date Submitted by the Author: | 31-Jan-2014                                                                                                                                                                                                                                                                                                                                                                                                                                                                                                                                                                                                                                                                                                                                                                                                                                                                                                                                                                                                                                                                                                                                                                                                                                                                                                                                                                                                                                                                                                                                                                                                                                                                                                                                                                                                                                                                                                                                                                                                                                                                                                                                   |
| Complete List of Authors:     | <p>Agyemang, Charles; Amsterdam Medical Center<br/>         Beune, Erik; Academic Medical Centre, Public Health<br/>         Meeks, Karlijn; Academic Medical Centre, Public Health<br/>         Owusu-Dabo, Ellis; Kwame Nkrumah University of Science and Technology, Faculty of Science<br/>         Adjei-Baffour, Peter; Kwame Nkrumah University of Science and Technology, Faculty of Science<br/>         de-Graft Aikins, Ama; University of Ghana, The Regional Institute for Population Studies<br/>         Doodoo, Francis; University of Ghana, The Regional Institute for Population Studies<br/>         Smeeth, Liam; London School of Hygiene and Tropical Medicine, Epidemiology and Population Health<br/>         Addo, Juliet; London School of Hygiene and Tropical Medicine, Epidemiology and Population Health<br/>         Mockenhaupt, Frank; Charité – Universitätsmedizin Berlin, Institute of Tropical Medicine and International Health<br/>         Amoah, Stephen; Charité – Universitätsmedizin Berlin, Institute of Tropical Medicine and International Health<br/>         Schulze, Matthias; German Institute of Human Nutrition, Danquah, Ina; German Institute of Human Nutrition,<br/>         Spranger, Joachim; Charité – Universitätsmedizin Berlin, Department of Endocrinology, Diabetes and Nutrition<br/>         Nicolaou, Mary; Academic Medical Centre, Public Health<br/>         Klipstein-Grobusch, Kirstin; University Medical Center, Julius Center for Health Sciences and Primary Care<br/>         Burr, Tom; Source BioScience,<br/>         Henneman, Peter; Academic Medical Centre, Department of Clinical Genetics<br/>         Mannens, Marcel; Academic Medical Centre, Department of Clinical Genetics<br/>         van Straalen, Jan<br/>         Bahendeka, Silver; IDF, African Region,<br/>         Zwinderman, AH; Academic Medical Centre, Public Health<br/>         Kunst, Anton; University of Amsterdam, Dept. of Public Health, Academic Medical Center (AMC)<br/>         Stronks, Karien; Academic Medical Centre / University of Amsterdam, Public Health</p> |
| <b>Primary Subject            | Diabetes and endocrinology                                                                                                                                                                                                                                                                                                                                                                                                                                                                                                                                                                                                                                                                                                                                                                                                                                                                                                                                                                                                                                                                                                                                                                                                                                                                                                                                                                                                                                                                                                                                                                                                                                                                                                                                                                                                                                                                                                                                                                                                                                                                                                                    |

1  
2  
3  
4  
5  
6  
7  
8  
9  
10  
11  
12  
13  
14  
15  
16  
17  
18  
19  
20  
21  
22  
23  
24  
25  
26  
27  
28  
29  
30  
31  
32  
33  
34  
35  
36  
37  
38  
39  
40  
41  
42  
43  
44  
45  
46  
47  
48  
49  
50  
51  
52  
53  
54  
55  
56  
57  
58  
59  
60

|                            |                                                                                                            |
|----------------------------|------------------------------------------------------------------------------------------------------------|
| Heading</b>:               |                                                                                                            |
| Secondary Subject Heading: | Diabetes and endocrinology, Cardiovascular medicine, Global health, Epidemiology, Nutrition and metabolism |
| Keywords:                  | General diabetes < DIABETES & ENDOCRINOLOGY, EPIDEMIOLOGY, Public health < INFECTIOUS DISEASES             |
|                            |                                                                                                            |

SCHOLARONE™  
Manuscripts

For peer review only

1  
2  
3 **Rational and cross-sectional study design of the Research on Obesity and Type 2 Diabetes**  
4 **among African Migrants: The RODAM study**  
5  
6

7 Charles Agyemang<sup>1\*</sup>, Erik Beune<sup>1</sup>, Karlijn Meeks<sup>1</sup>, Ellis Owusu-Dabo<sup>2</sup>, Peter Agyei-Baffour<sup>2</sup>, Ama  
8 de-Graft Aikins<sup>3</sup>, Francis Dodoo<sup>3</sup>, Liam Smeeth<sup>4</sup>, Juliet Addo<sup>4</sup>, Frank Mockenhaupt<sup>5</sup>, Stephen  
9 Amoah<sup>5</sup>, Matthias B. Schulze<sup>6</sup>, Ina Danquah<sup>6</sup>, Jochen Spranger<sup>7</sup>, Mary Nicolaou N<sup>1</sup>, Kirstin Klipstein-  
10 Grobusch<sup>8,9</sup>, Tom Burr<sup>10</sup>, Peter Henneman<sup>11</sup>, Marcel M. Mannens<sup>11</sup>, Jan P. van Straalen<sup>12</sup>, Silver  
11 Bahendeka<sup>13</sup>, AH Zwinderman<sup>14</sup>, Anton E. Kunst<sup>1</sup>, Karien Stronks<sup>1</sup>.  
12  
13

- 14 1. Department of Public Health, Academic Medical Centre (AMC), University of Amsterdam,  
15 Amsterdam, The Netherlands.
- 16 2. Faculty of Science, Kwame Nkrumah University of Science and Technology, Kumasi, Ghana.
- 17 3. The Regional Institute for Population Studies: University of Ghana, Legon, Ghana.
- 18 4. Department of Non-communicable Disease Epidemiology, London School of Hygiene and  
19 Tropical Medicine, London, UK.
- 20 5. Institute of Tropical Medicine and International Health, Charité – Universitätsmedizin Berlin,  
21 Berlin, Germany.
- 22 6. Department of Molecular Epidemiology, German Institute of Human Nutrition (DIfE),  
23 Potsdam-Rehbruecke, Nuthetal, Germany.
- 24 7. Department of Endocrinology, Diabetes and Nutrition, Charité – Universitätsmedizin Berlin,  
25 Germany.
- 26 8. Julius Center for Health Sciences and Primary Care, University Medical Center, Utrecht,  
27 Netherlands.
- 28 9. Division of Epidemiology and Biostatistics, School of Public Health, Faculty of Health  
29 Sciences, University of the Witwatersrand, Johannesburg, South Africa.
- 30 10. Source BioScience, Nottingham, UK.
- 31 11. Department of Clinical Genetics, Academic Medical Centre, Amsterdam, The Netherlands.
- 32 12. Department of Clinical Chemistry, Academic Medical Centre, Amsterdam, The Netherlands.
- 33 13. International Diabetes Federation, Africa Region, Kampala, Uganda.
- 34 14. Department of Clinical Epidemiology, Bioinformatics, and Biostatistics, Academic Medical  
35 Centre, University of Amsterdam, Amsterdam, The Netherlands.  
36  
37  
38  
39  
40  
41  
42  
43  
44  
45  
46  
47  
48  
49  
50

---

51 \*Correspondence to: Dr Charles Agyemang, Department of Public Health, Academic Medical Centre, University of Amsterdam,  
52 Meibergdreef 9, 1105 AZ Amsterdam, The Netherlands, Tel: 0031 20 5664885, Fax: 0031 20 6972316. Email: c.o.agyemang@amc.uva.nl  
53  
54  
55  
56  
57  
58  
59  
60

## Abstract

**Introduction:** Obesity and type 2 diabetes (T2D) are highly prevalent among African migrant compared to European descent populations. The underlying reasons still remain a puzzle. Gene-environmental interaction is now seen as a potential plausible factor contributing to the high prevalence of obesity and T2D, but has not yet been investigated. The overall aim of the RODAM (Research on Obesity and Diabetes among African Migrants) project is to understand the reasons for the high prevalence of obesity and T2D among Sub-Saharan Africans in diaspora by (a) studying the complex interplay between environment (e.g. lifestyle), healthcare, biochemical and (epi)genetics and their relative contributions to the high prevalence of obesity and T2D; (b) to identify specific risk factors within these broad categories to guide intervention programmes; and (c) to provide a basic knowledge for improving diagnosis and treatment.

**Methods and Analysis:** RODAM is a multi-centre cross-sectional survey among homogenous Sub-Saharan African participants (i.e. Ghanaians) aged >25 years living in rural and urban Ghana, Netherlands, Germany, and the UK (<http://rod-am.eu/>). Standardised data on the main outcomes (obesity and T2D), environmental factors (e.g. lifestyle, socio-economic factors, psychosocial stress and healthcare access), genetics and biochemical factors are collected in all locations. The aim is to recruit 6,250 individuals comprising five subgroups of 1,250 from each site (i.e. rural-Ghana, urban-Ghana, Netherlands, Germany and UK). In Ghana, Kumasi and Obuasi (urban stratum) and 15 villages in the Ashanti region (rural stratum) are served as recruitment sites. In Europe, Ghanaian migrants are selected through the municipality or Ghanaian organisations registers.

**Ethics and dissemination:** Ethical approval has been obtained in all sites. This paper gives an overview of the rationale, conceptual framework and methods of the RODAM study. The differences in obesity and T2D prevalence within Ghana on the one hand, and between three European countries on the other, will allow us to gain insight into environmental, biochemical and (epi)genetic factors contributing to the occurrence of obesity and T2D among these populations. The new insights will inform targeted intervention and prevention programmes, and provide a basis for improving diagnosis and treatment in these populations and beyond.

### Abbreviations:

RODAM: Research on Obesity and Diabetes among African Migrants

T2D: Type 2 Diabetes

CVD: Cardiovascular disease

EA: Enumeration Area

GPAQ: Global Physical Activity Questionnaire

FPQ: Food Propensity Questionnaire

ABI: Ankle-Brachial-Index

BIA: Bioimpedance Analysis

GWAS: Genome-wide association study

## Introduction

Ethnic minority and migrant populations in Europe have been disproportionately affected by both obesity and diabetes compared with the host European origin populations (henceforth, Europeans).<sup>1-4</sup> The prevalence of type 2 diabetes (T2D), for example, is about three to five times higher than in Europeans.<sup>4</sup> They also develop T2D at a younger age; and they have higher morbidity and mortality from T2D and related complications such as cardiovascular disease (CVD) than European populations.<sup>4,5</sup> The little available information suggests that sub-Saharan Africa (SSA) migrants are particularly affected by obesity and T2D.<sup>3</sup> In the Health Survey for England (HSE) 2004, the prevalence rates of T2D were 16.2% and 6.0% in sub-Saharan African men and women aged  $\geq 35$  years compared with 5.1% and 2.4% in English general population men and women, respectively.<sup>6</sup>

Obesity and T2D prevalence rates are not only escalating among SSA migrants, but also in their home countries. The increasing levels of obesity and T2D in SSA countries have been unprecedented and pose huge challenges for many countries. While T2D seemed to be virtually absent, for example, in West Africa in the 1960s and 1980s (0.2-1.7%), today it has become a major health problem affecting almost 7% of the adult population.<sup>7-10</sup> Projections indicate that the number of T2D patients in SSA will double from 14.7 million in 2011 to 28 million in 2020,<sup>11</sup> undoubtedly among one of the highest growth rates of T2D worldwide.<sup>11,12</sup> This correlates with the simultaneous increase of obesity in the same region.<sup>7</sup> A systematic review found that the prevalence of obesity in urban West Africa has more than doubled over 15 years.<sup>9</sup> The serious cardiovascular complications of obesity and T2D could overwhelm SSA countries that are already straining under the burden of communicable diseases.

The reasons for the increased susceptibility of ethnic minority groups and migrants to obesity and T2D are poorly understood. Increased T2D prevalence and complications in African populations both in SSA and industrialised countries have been attributed to delayed diagnosis and poor management due to low socioeconomic status. However, ethnic differences persist even when demographic, socioeconomic status, behavioural and clinical parameters have been taken into account,<sup>13</sup> suggesting that other factors such as genetic predispositions might be important. The validity of this finding, nonetheless, is limited because of the heterogeneity of migrants studied so far. Heritability estimates for T2D range up to 40%,<sup>14-15</sup> but genetic variations thus far identified, contribute only a small fraction of the inherited risk.<sup>16</sup> While genetic factors alone cannot explain the increasing prevalence of obesity and T2D, it is clear that the high prevalence of obesity and T2D is a result of a complex interplay of environmental and genetic factors that are likely to vary in different settings and among different population groups. Genetic predispositions and interactions between environmental and genetic factors may be involved in the onset and development of diseases such as obesity and T2D among migrant populations. The 'thrifty genotype' and 'thrifty phenotype' hypotheses are considered to be the underlying mechanism of the gene-environment interaction contribution to disease susceptibility.<sup>17-21</sup> While gene-environment interactions may play an important role in disease susceptibility, research in this area, particularly within the context of human migration is in its infancy.

The high levels of obesity and T2D among migrant populations may also be influenced by lifestyle changes following migration<sup>3</sup> as well as psychological stress.<sup>22</sup> Evidence from cohort studies demonstrate the importance of lifestyle factors such as physical inactivity and smoking on obesity and T2D.<sup>23-27</sup> However, among migrant populations, interventions to reduce obesity and T2D have often been ineffective,<sup>28</sup> and efforts often fail to meet the specific needs of ethnic minority and migrant populations.<sup>29</sup> The local circumstances of ethnic minority and migrant populations, such as socioeconomic development of the groups, race relations and access to health care and preventive

1  
2  
3 services, may differ greatly among industrialised countries.<sup>30-31</sup> These differential contexts can  
4 influence health behaviour, psychosocial stress and health care use among ethnic minority and migrant  
5 groups, and subsequently lead to differences in CVD health outcomes between similar populations  
6 living in different countries.  
7

8 The RODAM project - an European Commission funded project – aims to understand the reasons for  
9 the high prevalence of obesity and T2D among African migrants by (a) studying the complex interplay  
10 between environmental exposures and genetics and their relative contributions to the high prevalence  
11 of obesity and T2D; (b) to identify specific risk factors within these broad categories to guide  
12 intervention programmes, and (c) to provide a basic knowledge for improving diagnosis and treatment.  
13 A conceptual model of the RODAM project is presented in Figure 1.<sup>32</sup> It shows that following  
14 migration, migrants may be exposed to varied contexts, such as different opportunities for socio-  
15 economic development, different availability of food supply, different health systems and policies, and  
16 different cultural traditions; and these differences may influence their health behaviour, physical and  
17 psychosocial stress and subsequently lead to differences in obesity and T2D risks.  
18  
19  
20  
21

## 22 **Methods**

23  
24 To achieve RODAM study goals, a multi-disciplinary consortium of researchers from Europe  
25 (University of Amsterdam, Utrecht University, London School of Hygiene and Tropical Medicine,  
26 Charité - Universitätsmedizin Berlin, German Institute of Human Nutrition) and Africa (University of  
27 Ghana, Kwame Nkrumah University of Science and Technology and the International Diabetes  
28 Federation (IDF), African region) with broad experience on chronic diseases in Africans and African  
29 migrants have joined forces. As a central feature of the RODAM project, at all study sites, highly  
30 standardised protocols of quantitative and qualitative assessments are applied for participant  
31 recruitment and topic-related investigations.  
32  
33

### 34 *Study Population*

35  
36 Assessing the role of gene-environmental interactions in risk factors, such as obesity and T2D, among  
37 migrant populations requires a highly standardised approach and relatively homogeneous migrating  
38 and non-migrating populations. For this reason, we concentrate on a relatively homogenous SSA  
39 migrant population to enable comparisons of the prevalence of obesity and T2D between SSA  
40 migrants living in different European countries and their compatriots living in rural and urban SSA as  
41 outlined in the *WHO Global Consultation on Migrant Health* report.<sup>33</sup> Consequently, adult Ghanaians  
42 (aged  $\geq 25$  years) are recruited in rural and urban Ghana, and in the cities of Amsterdam, Berlin and  
43 London. Ghanaians are one of the largest SSA migrant groups in Europe.<sup>34-36</sup> The 2009 estimates by  
44 the Office for National Statistics recorded 93,000 Ghanaian-born people living in the UK. The  
45 majority of Ghanaians in the UK are concentrated in London boroughs of Southwark, Lambeth,  
46 Newham, Hackney, Haringey, Lewisham, Croydon, Merton and Brent.<sup>34</sup> In Germany, 22,000 people  
47 are officially registered as Ghanaians the majority of whom are concentrated in Berlin, Hamburg and  
48 North-Rhine Westphalia.<sup>35</sup> In the Netherlands, in 2009 there were approximately 20,000 officially  
49 recorded Ghanaians. The majority of these are concentrated in southeast Amsterdam.<sup>36</sup>  
50  
51  
52

## 53 **Recruitment of the study participants**

### 54 *Engagement of Ghanaian community*

55  
56  
57  
58  
59  
60



1  
2  
3 Previous work in the Netherlands and a feasibility study among African communities in the UK show  
4 that involvement of the community leaders enhances study participation and may help prevent a low  
5 response rate relating to language barriers and lack of understanding about the relevance of the  
6 study.<sup>37-38</sup> The RODAM project therefore involves the Ghanaian community leaders in all sites. This  
7 include working with religious communities (e.g., churches, mosques), endorsement from local key  
8 figures, and establishing relationships with health care organisations that serve these groups. In  
9 addition, the project team provides information about the study via local media aim at the Ghanaian  
10 population (e.g., Ghanaian radio and TV stations).  
11

12  
13 Because of differences in the population registration systems across European countries as well as in  
14 Ghana, different approaches are needed for the recruitment of the study populations across locations.  
15 For example, there is a population register in the Netherlands where the Ghanaian migrants could be  
16 identified and randomly selected for the study. In Ghana, the UK and Germany, the situation is quite  
17 different as there are no population registers that will allow for these easy identification of these  
18 populations. It is important, however, to adopt the recruitment strategies that are as comparable as  
19 possible across locations. Below we describe the various recruitment strategies in each site..  
20  
21

#### 22 23 *Recruitment strategy in Ghana*

24  
25 In Ghana, two cities (Kumasi and Obuasi) and 15 villages in the Ashanti region are served as the  
26 urban and rural recruitment sites. The initial sampling frame was the list of enumeration areas in the  
27 Ashanti region from the 2010 census. A multistage random sampling procedure was adopted to arrive  
28 at the sampling of 30 Enumeration Areas (EAs). Enumeration areas were stratified, weighted and a  
29 random sample of rural and urban enumeration areas selected. There are over two thousand urban and  
30 more than 1000 rural EAs, respectively. The first stage was to group the districts into two main  
31 categories: districts with a high number of urban (Kumasi and Obuasi) and districts with a high  
32 number of rural EAs. The next stage of sampling was to put the EAs together in each of the categories  
33 and take a weighted random sample of 10 for Kumasi and 5 for Obuasi, respectively. The procedure  
34 was repeated for the rural EAs by adding all the EAs in the selected districts and weighted from the  
35 first stage together after which a simple random sample procedure was adopted to select the total  
36 number of rural EAs (15) required for the study. Letters are sent to all selected health and community  
37 authorities to notify them of the start of the study. We send team members to the various communities  
38 to stay among them. Once within the community, the team then organise mini clinics in the field for a  
39 period of 1-2 weeks depending on the sampled population and responsiveness of respondents.  
40  
41  
42  
43

#### 44 45 *Recruitment strategy in the Netherlands*

46  
47 In the Netherlands, Ghanaian subjects were randomly drawn from Amsterdam Municipal Health  
48 register. This register contains data on country of birth of citizens and their parents, thus allowing for  
49 sampling based on the Dutch standard indicator for ethnic origin. All selected subjects aged  $\geq 25$  years  
50 were sent a written invitation combined with written information regarding the study and a opting out  
51 response card. Participants are reminded by phone or home visit after 2 weeks if there is no response.  
52 After a positive response, an appointment for physical examination at a local health centre is made  
53 over the phone follow by a confirmation letter of the appointment and a digital or paper version of the  
54 questionnaire (depending on the preference of the subject) is sent to the subject's home address.  
55  
56  
57  
58  
59  
60

### *Recruitment strategy in the UK*

The UK has no population register for migrant groups. Consequently, Ghanaian organisations are served as the sampling frame. Lists of these organisations have been obtained from the Ghanaian Embassy and the Association of Ghanaian Churches in the UK in the boroughs known to have the greatest concentration of Ghanaians. Lists of all members of their organisations if available have also been requested, from which a number of all participants aged  $\geq 25$  years are invited to participate in the study. The selected subjects receive a written invitation combined with written information regarding the study and a opting out response card. Participants are sent a confirmation letter of the appointment for a physical examination at a local health centre, church or community centre, including a digital or paper version of the questionnaire (depending on the preference of the subject) if they agree to participate in the study.

### *Recruitment strategy in Germany*

In Berlin, a list of Ghanaian individuals (born in Ghana, or Ghanaian passport holders) was provided by the registration office and that was supplemented with contact details of members of Ghanaian organisations and churches in Berlin. From this combined list, all participants aged  $\geq 25$  years have been invited to participate in the study. In addition, a written invitation combined with written information regarding the study and a response card has been sent to the selected subjects. Participants are reminded after 2 weeks if there is no response. After a positive response, the participants are contacted by phone to schedule date and location of the interview with a trained research assistant or opt for the digital online version. Subsequent to the completion of the questionnaire, a date for physical examination is then scheduled.

### *Ethical approval*

Ethical approval of the study protocols has been requested at all sites from the respective ethics committees in Ghana (School of Medical Sciences/Komfo Anokye Teaching Hospital Committee on Human Research, Publication & Ethical Review Board), Netherlands (Institutional Review Board of the AMC, University of Amsterdam), Germany (Ethics Committee of Charite-Universitätsmedizin Berlin) and the UK (London School of Hygiene and Tropical Medicine Research Ethics Committee) before data collection began in each country. Informed written consent is also obtained from each participant prior to the enrolment in the study. In addition, an external independent Ethical advisor has been appointed by the RODAM Steering Committee to oversee the ethical issues in RODAM study.

### *Power and Data analysis*

In the presented study we aim to sample 6,250 individuals comprising five subgroups of 1,250 each from the 5 locations. For phenotypic, genetic and epigenetic studies subsets are selected. In order to estimate the statistical power with regard to different sample sizes in the three types of data we evaluated three distinct types of statistical power calculations with regard to the type of survey.

Phenotypic association: For the phenotypic association analysis we assumed a prevalence of T2D of  $< 5\%$  in rural Ghana,  $6-7\%$  in urban Ghana and  $> 12\%$  in Europe.<sup>32,39</sup> For obesity we assumed a prevalence of  $< 5\%$  in rural Ghana,  $17\%$  in urban Ghana, and  $30\%$  in Europe.<sup>2,39</sup> In general, we aim for a power of 0.90 with  $\alpha=0.05$  (incl. Bonferroni correction). Using these parameters a sample size of approximately 1230 is needed in the rural Ghana, urban Ghana, Amsterdam, London and Berlin subsets to detect a difference between the group proportions of 5%. T2D was defined as fasting

1  
2  
3 plasma glucose  $\geq 7$  mmol/L, or pre-existing anti-diabetic medication or HbA1c  $\geq 6.5\%$ .<sup>40</sup> Generalised  
4 obesity was defined as body mass index  $\geq 30.0$  kg/m<sup>2</sup>, and central obesity as a waist circumferences  
5  $>102$  cm in males or  $>88$  cm in females.<sup>41-42</sup>  
6

7 Genetic association: The present study aims to genotype a substantial part of the total sample among  
8 diabetics (cases) and non-diabetes (controls). The genotyping will be based on a standard SNP array  
9 platform suitable for performing genome wide association study (GWAS) as well as candidate gene  
10 analysis or related approaches. Using the statistical power calculator on binary traits for a case –  
11 control study design (S. Purcell; <http://pngu.mgh.harvard.edu/>), assuming an allele frequency of 0.25,  
12 a prevalence of 16%, a relative risk of 1.3 and 1.6 (Aa and AA rep.), a D' prime of 1, the number of  
13 cases of 1000 (1:2 case control ratio) and a type I error rate of 0.05, approximately 540 cases are  
14 considered sufficient to obtain a power of 0.90. Although the latter necessary sample size is covered  
15 by our study, it should be noted that correction for multiple tests, i.e. if more than one genetic variant  
16 is tested, is not considered here. Nevertheless, candidate gene or related association approaches within  
17 this single study setup have sufficient statistical power to detect moderate and low effect sizes.  
18  
19

20  
21 Epigenetic association: To explore the influence of epigenetic factors on the main outcomes, we will  
22 first assess the differences in methylation levels among Ghanaians living in rural-Ghana, urban and  
23 Europe and their relative contributions to the differences to obesity and T2D that may be observed.  
24 With study power of 0.80 and  $\alpha=0.05$  (and SD  $\pm 0.10\%$ ), at least 64 people per group are needed to  
25 detect a mean percentage difference in methylation density of 5%. When multiple correction is taken  
26 into account, about 300 individuals per group participants are needed. Epigenome-wide analysis will  
27 be performed. Association analysis of the DNA-methylation profiles and obesity and T2D and related  
28 phenotypes will subsequently be performed. Promising loci will then be validated using next  
29 generation bisulphite sequencing.  
30  
31

32  
33 Simple tables, proportions, mean and median values will be used to examine the data. Multivariable  
34 linear and logistics regression analyses will be used to assess the differences and to identify specific  
35 relevant factors and their relative contribution to the differences in body indices and fasting glucose  
36 (both continuous and binary traits) between Ghanaian migrants and non-migrants.  
37  
38

### 39 **Data collection**

40  
41 Data collection is composed of questionnaire/interviews, physical examination and biological samples.  
42 The methods for data collection in RODAM are identical in all locations following standard operating  
43 procedures and applying standardised tools. Questionnaires have been adapted to the local  
44 circumstances in Ghana, Netherlands, UK, and Germany where needed. For example, for all sites  
45 modification of questions with respect to educational system or social security system were made.  
46 Before data collection, a two-day training course in the Netherlands was organised for all those  
47 involved in data collection, on the overall project's procedures. The training involved the  
48 administration of the different questionnaires, physical examinations, processing of blood and urine  
49 samples in the laboratory and transport and storage of samples. The work package leaders, in turn,  
50 train all recruitment team members in each site on all aspects of study. Interviewers are recruited  
51 among Ghanaian-speaking residents in Europe, are introduced to the aims and procedures of the study,  
52 and are instructed and trained on the use of the questionnaires. Research assistants also receive the on-  
53 line tutorial for the Oracle Clinical data entry system. The performance of each interviewer or research  
54 assistant is monitored during the initial interviews and physical examinations. Feedback is provided  
55  
56  
57  
58  
59  
60

and changes initiated if needed. The RODAM coordinator monitors data collection at all study sites to ensure standardisation of methods.

### Questionnaire/interviews

All the participants who agree to participate in the study receive an appointment for a structured interview. The interviews are conducted by trained interviewers of Ghanaian background and last for about 60-120 minutes. To increase participation rate, the participants are given a range of options including interviews in participants' homes, digital or paper version of the questionnaire depending on the preference of the participant. The interviewers conduct the interviews in the preferred language of the respondent either in English, German, Dutch or Ghanaian languages. The interview is based on a structured health questionnaire, and contains questions on demographics (age, sex, marital status, household composition, religion), socio-economic position (education level and parental education, employment status and parental employment status, occupational status and wealth), migration related factors (pre-migration history, age at first migration, age at arrival in current location, duration of residence, cultural distance and ethnic identity), psychosocial vulnerability (perceived discrimination, social support, mastery, recent negative life events and current depression), health status (self-reported general health and presence and history of diseases, family history of diseases), health care use (visit to GP, specialists, psychological care, alternative health care) and health behaviour (e.g. dietary behaviour, physical activity, alcohol and smoking, perceived body weight and body shape and adherence to medications) by using appropriate validated instruments (Table 1). For example, physical activity is measured using the WHO Global Physical Activity Questionnaire (GPAQ) version 2.<sup>43</sup> Dietary behaviour is determined by a Food Propensity Questionnaire (FPQ), specifically developed in RODAM to include Ghana-specific foods. In addition, a 24 hour dietary recall questionnaire will be administered to a subset of the study population in each site (n=5\*100).

**Table 1: Variables measured in the RODAM questionnaire**

| Themes                              | Variable/Measure                                                                                                                                                                                                                                                                    | Questionnaire instrument/measures                                                                                                                                                                                                                                                                                                                                        |
|-------------------------------------|-------------------------------------------------------------------------------------------------------------------------------------------------------------------------------------------------------------------------------------------------------------------------------------|--------------------------------------------------------------------------------------------------------------------------------------------------------------------------------------------------------------------------------------------------------------------------------------------------------------------------------------------------------------------------|
| Demographics                        | Age, sex, marital status, religion, tribe, locality                                                                                                                                                                                                                                 | -                                                                                                                                                                                                                                                                                                                                                                        |
| Socioeconomic status                | <ol style="list-style-type: none"> <li>1. Education</li> <li>2. Employment status</li> <li>3. Wealth</li> <li>4. Parental socio-economic status</li> </ol>                                                                                                                          | <ol style="list-style-type: none"> <li>1. Education attainment</li> <li>2. Nature of work</li> <li>3. Household index; Wealth index (only in Ghana)</li> <li>4. Father and mother education attainment and profession</li> </ol>                                                                                                                                         |
| Migration related factors           | Generation, duration of residence in Europe, religion, cultural distance, migration history                                                                                                                                                                                         | -                                                                                                                                                                                                                                                                                                                                                                        |
| Health status                       | <ol style="list-style-type: none"> <li>1. General health</li> <li>2. Presence and history of diseases and family history of diseases</li> </ol>                                                                                                                                     | <ol style="list-style-type: none"> <li>1. SF-12<sup>44</sup></li> <li>2. Various health conditions</li> </ol>                                                                                                                                                                                                                                                            |
| Psychosocial factors                | <ol style="list-style-type: none"> <li>1. Perceived discrimination</li> <li>2. Perceived social support</li> <li>3. Dealing with everyday problems</li> <li>4. Recent experiences (stressful life events)</li> <li>5. Psychological stress</li> <li>6. Recent well-being</li> </ol> | <ol style="list-style-type: none"> <li>1. Everyday Discrimination Scale<sup>45</sup></li> <li>2. SSQT Satisfaction Emotional Support subscale<sup>46</sup></li> <li>3. Mastery<sup>47</sup></li> <li>4. List of Threatening Experiences<sup>48</sup></li> <li>5. 2 items from INTERHEART<sup>49</sup></li> <li>6. Patient Health Questionnaire-9<sup>50</sup></li> </ol> |
| Health care use and related factors | Visits to GP, specialists, psychological care, alternative health care                                                                                                                                                                                                              | Last four weeks                                                                                                                                                                                                                                                                                                                                                          |

|                  |                                         |                                                                              |
|------------------|-----------------------------------------|------------------------------------------------------------------------------|
| Health behaviour | 1. Smoking                              | 1. -                                                                         |
|                  | 2. Alcohol intake                       | 2. -                                                                         |
|                  | 3. Physical activity                    | 3. WHO Global Physical Activity Questionnaire (GPAQ) version 2 <sup>43</sup> |
|                  | 4. Dietary behaviour                    | 4. Ghana specific FPQ, 24h dietary recalls for sub-sample (n=5*100)          |
|                  | 5. Perceived body weight and body shape | 5. Pulvers Instrument to measure body image <sup>51</sup>                    |
|                  | 6. Adherence to medication              | 6. Self-reported adherence <sup>52</sup>                                     |

All participants who complete the questionnaire are invited for physical examination in the local research clinic or in a health centre. At the start of the visit, the study and the procedures involved are explained to each participant and informed consent is signed if not already done so at home. After informed consent is given, physical measurements are made and biological samples, fasting blood and urine samples are collected.

### Physical measurements

Physical examinations are performed with validated devices according to standardised operational procedures. Physical examinations comprise assessment of anthropometrics (weight, height, trunk, waist circumference and hip circumference), Bioimpedance Analysis (BIA), blood pressure and ankle-arm-index measures (Table 2). The portable stadiometer SECA 217 is used for height measurement, the SECA 877 for weight measurement, measuring tape for abdominal and hip circumference and BODYSTAT<sup>®</sup> 1500 MDD analyzer for BIA. Blood pressure is measured three times using validated semi-automated device (The Microlife<sup>®</sup> WatchBP<sup>®</sup> home) with appropriate cuffs in a sitting position after at least five minute rest. Ankle-Brachial-Index (ABI) is measured with The Microlife<sup>®</sup> WatchBP Office ABI with appropriate cuffs in a supine position after at least ten minutes rest. Each participant receives a summary of his/her main results accompanied by an explanation and the recommendation to contact his/her General Practitioner (GP) if the results are abnormal.

**Table 2: Physical examination variables measured in the RODAM**

| Themes               | Measures                                                                                                                 | Instrument                                                                                                                 |
|----------------------|--------------------------------------------------------------------------------------------------------------------------|----------------------------------------------------------------------------------------------------------------------------|
| Anthropometrics      | 1. Weight<br>2. Height & Trunk<br>3. waist circumference<br>4. Hip circumference<br>5. Body fat (Bio Impedance Analysis) | 1. SECA 877<br>2. SECA 217<br>3. Measuring tape<br>4. Measuring tape<br>5. BODYSTAT <sup>®</sup> 1500 MDD analyzer for BIA |
| Blood pressure       | Systolic and diastolic blood pressure, measured 3 times in a sitting position after at least 5 minutes rest              | The Microlife <sup>®</sup> WatchBP <sup>®</sup> home                                                                       |
| Ankle-Brachial-Index | Ankle-Brachial-Index, measured in a supine position after at least ten minute rest                                       | The Microlife <sup>®</sup> WatchBP Office ABI                                                                              |

### Biological material

#### *Blood samples*

Fasting venous blood samples are collected by trained research assistants in all sites. All blood samples are manually processed and aliquoted immediately after collection by a trained technician or research assistant according to standard operational procedures, and then temporarily stored at the



1  
2  
3 local research location. Immediate processing and cryopreservation at the research location has the  
4 advantage of preserving any highly labile molecules in the samples. Standardized procedures ensure  
5 that each sample is collected, handled, processed, transported, and stored in the same way across sites.  
6 The samples are then transported to the respective local laboratories (Durrer Center for Cardiogenetic  
7 Research at the AMC, Amsterdam; Kwame Nkrumah University of Science and Technology, KCCR,  
8 Kumasi, Faculty of Infectious and Tropical Diseases, LSHTM, London & Institute of Tropical  
9 Medicine and International Health, Berlin) where samples are checked, registered, and stored at -80°C.  
10 These samples include EDTA whole blood, heparin plasma and serum. In addition, on the spot, fasting  
11 plasma glucose level is assessed by validated hand held device (Accu-Chek Performa meter + Accu-  
12 Chek Inform II test strip (Roche, Germany) in all sites to provide accurate glucose determination as  
13 blood glucose concentration tends to decline over time in blood samples.<sup>53</sup>  
14  
15

### 16 17 *Morning urine sample*

18 Participants are asked to bring the first early morning urine in a clean jar. The urine sample is tested  
19 with a dipstick in the Urysis 1100 (Combur 7, Roche) on the spot, to determine pH, glucose, ketones,  
20 leucocytes, nitrite, protein and erythrocytes. One sample per participant is transported, together with  
21 the blood samples, to respective local laboratory and stored at -80°C.  
22  
23

### 24 *Transfer of biological material to dedicated centres for biochemical analyses and genotyping*

25 From the local research centres the two aliquoted samples, one urine sample and a 2 ml EDTA are  
26 then transported to Berlin for biochemical analyses including glucose metabolism (fasting glucose,  
27 HbA1c, insulin), lipid profile (total cholesterol, HDL-cholesterol, LDL-cholesterol and triglycerides),  
28 electrolytes and renal function (creatinine, albumin, sodium, potassium, calcium), uric acid  
29 metabolism (uric acid), liver metabolism (alanine transaminase (ALT), aspartate aminotransferase  
30 (AST), gamma-glutamyl transpeptidase (GGT)), oxidative status and iron metabolism (ferritin) and  
31 inflammation (hsCRP); and a 4 ml EDTA whole blood sample was transported to Nottingham for  
32 DNA extraction and genotyping. Shipping of the samples from European sites is done using styrofoam  
33 boxes filled with dry ice and from Ghana in dry shippers filled with liquid nitrogen. Numerous factors  
34 including temperature, packaging, courier, sample type, import/export requirements, seasons, costs,  
35 and transit time/ship days can affect biological specimen integrity during transportation both  
36 domestically and internationally. Hence, staff involved with shipping the specimens has been trained  
37 in order to minimise factors that might affect the integrity of the specimens. In addition, training  
38 regarding legal or regulatory aspects of shipment of specimens such as Material Transfer Agreement  
39 (MTA) has been given. Each centre maintains a shipment log to record the receipt and dissemination  
40 of shipments sent from the centre. Each shipment entry is given a unique shipment number.  
41  
42  
43  
44  
45  
46

### 47 **Qualitative interviews of perception and knowledge of obesity and T2D**

48 Interventions to reduce obesity and T2D have often been ineffective particularly in migrant  
49 populations.<sup>28</sup> This may, in part, relate to poor perceptions and knowledge about both conditions.  
50 Access to preventive and curative services may depend on a wide range of factors including  
51 knowledge of services and how to use them, health beliefs and attitudes, language barriers, the  
52 sensitivity of services to differing needs and the quality of care provided. Gaining in-depth insight into  
53 these factors requires qualitative methodology. Thirty-two individual interviews with people with  
54 diabetes and 8 focus groups (including up to 8 participants per group) with lay healthy individuals will  
55  
56  
57  
58  
59  
60



1  
2  
3 be held at each location. Segmentation categories for purposive sampling for people with diabetes are  
4 gender, duration of diabetes, BMI status and age. Each individual interview and focus group interview  
5 is conducted by trained interviewers using the same themes across all sites and had duration of 60-90  
6 minutes. Interviews are recorded, transcribed and analysed using qualitative data software. A coding  
7 framework of themes is developed based on the RODAM theoretical framework and social  
8 representations theory.<sup>54,55</sup> Coding is done inductively and deductively through a constant comparative  
9 approach. All transcripts are coded separately by two independent researchers and systematically  
10 discussed and compared for inter-rater reliability.  
11  
12

### 13 14 15 **Current status of the study**

16  
17 The RODAM project study is currently enrolling participants from five localities in 4 countries. As of  
18 January 2014, we have examined and interviewed 3868 participants (rural n=1057, urban Ghana  
19 n=863, Amsterdam n=1011, London n=597 and Berlin n=340) who fulfilled the RODAM eligibility  
20 criteria. Blood and urine samples from these participants have been stored at the local sites in Ghana,  
21 Amsterdam, London and Berlin. Part of these samples have been successfully shipped from the study  
22 sites to Charité – Universitätsmedizin Berlin for biochemical analyses, and to Scource Bioscience in  
23 Nottingham for DNA extraction. Genotyping will commence once all the data collection is completed.  
24 The data collection for the qualitative part of the project is ongoing in rural and urban Ghana,  
25 Amsterdam and London. Database has been built and the outline of the data storage-structure has been  
26 defined. The data analysis will begin once the data cleaning is completed.  
27  
28  
29  
30  
31

### 32 **Discussion**

33  
34 SSA migrants to Europe belong to one of the fastest growing migrant groups in Europe today.<sup>56</sup> The  
35 unprecedented high levels of cardiovascular diseases and related risk factors, such as obesity and T2D,  
36 have huge clinical care and public health implications. Consequently, the need to get detailed insights  
37 into the possible underlying determinants of obesity and T2D and related complications to help  
38 support the preventive efforts as well as clinical management is increasingly being recognised. This is  
39 particularly so in major European cities where some of these populations form a major part of the  
40 patient population.<sup>31</sup> Simultaneously, African countries are facing huge challenges regarding obesity  
41 and T2D and related complications.<sup>7,9</sup> This issue was recently highlighted in the meeting of the general  
42 assembly of the United Nations on Non-Communicable Diseases in 2011 as an important epidemic of  
43 our times: (<http://www.un.org/en/ga/president/65/issues/ncdiseases.shtml>). Unfortunately, the  
44 established health education and lifestyle interventions mainly in the European host populations may  
45 not be applied in migrant populations and other world regions such as Africa because of differences in  
46 susceptibility, nutrition, social circumstances and culture. Still, both in Africa and among African  
47 migrants, data are highly fragmentary and based on heterogeneous populations. Consequently, the  
48 magnitude of the problem is uncertain and the relative contribution of risk factors is undefined. Thus,  
49 it is difficult to set rational priorities for targeted health interventions and policies, and to monitor  
50 progress towards set goals. Knowledge on health-related outcomes that are directly associated with the  
51 migration process will allow for the most effective and appropriate use of interventions, efforts and  
52 investments to improve and promote the health of these populations.<sup>51</sup>  
53  
54  
55  
56  
57  
58  
59  
60

1  
2  
3 Comparative studies such as RODAM have an enormous potential for both migrant populations and  
4 for the countries from which they have migrated from. For migrant populations, it provides indications  
5 of how exposure to different environmental circumstances might influence health outcomes. This is  
6 highly relevant in that the industrialised countries themselves differ greatly in terms of opportunities  
7 for socio-economic development of the migrant groups, race relations, and access to health care and  
8 preventive services.<sup>57</sup> These differential contexts can undoubtedly influence health behaviour and  
9 health care use among migrant groups, and subsequently lead to differences in health outcomes  
10 between similar migrant populations living in different countries.<sup>30,32</sup> For the countries of origin, the  
11 rapid increases of obesity and T2D following migration to high-income countries give a clear  
12 indication of the vulnerability of the population left behind as many of these countries continue to  
13 westernise.<sup>57</sup>  
14  
15

16  
17 The high prevalence of obesity and T2D among migrant groups obviously is a result of a multitude of  
18 different factors. Thorough understanding of the factors is a prerequisite for efficient intervention and  
19 prevention. The rigorous characterisation of biochemical parameters and specific environmental  
20 factors as well as epigenetic factors will allow comparing the major pathophysiological aspects of  
21 obesity and T2D between African migrants and their compatriots who did not migrate. Epigenetic data  
22 have a huge potential to point to, as yet, unrecognised pathophysiological pathways in obesity and  
23 T2D, and thus reveal options for improved diagnosis and treatment.  
24

25  
26 The RODAM project will deliver up-to-date data on obesity and T2D among SSA migrants in Europe  
27 and their home country. This will allow us to draw conclusions on the magnitude of the problem and  
28 deduce the attributable risk of migration from rural to urban environment as well as migration to  
29 Europe for obesity and T2D. Our findings on the influence of migration (from Africa to Europe) will  
30 help health care providers and health policy stakeholders to better understand and predict comparable  
31 developments in other African populations and in other parts of the world; and to (re)direct efforts to  
32 the most obvious changes induced by migration that affect obesity and diabetes.  
33  
34  
35  
36  
37  
38  
39  
40  
41  
42  
43  
44  
45  
46  
47  
48  
49  
50  
51  
52  
53  
54  
55  
56  
57  
58  
59  
60

**Acknowledgement**

We are very grateful to the advisory board members for their valuable support in shaping the methods, and to the Ghanaian volunteers participating in this project.

**Funding statement:**

This work is supported by the European Commission under the Framework Programme (Grant Number: 278901).

**Authors' contributions**

CA, EO, AGA, LS, JA, FM, ID, MBS, JS, KG, SB, AZ, AK & KS developed the origin grant proposal. CA, EB & KM prepared the first draft with the support of all authors. All authors read and approved the final manuscript.

**Competing Interests**

None

## References

1. Misra A, Ganda OP. Migration and its impact on adiposity and type 2 diabetes. *Nutrition* 2007;23:696-708.
2. Agyemang C, Owusu-Dabo E, de Jonge A, *et al.* Overweight and obesity among Ghanaian residents in The Netherlands: how do they weigh against their urban and rural counterparts in Ghana? *Public Health Nutr* 2009;12:909-16.
3. Agyemang C, Addo J, Bhopal R, *et al.* Cardiovascular disease, diabetes and established risk factors among populations of sub-Saharan African descent in Europe: a literature review. *Global Health* 2009;5:7.
4. Oldroyd J, Banerjee M, Heald A, *et al.* Diabetes and ethnic minorities. *Postgrad Med J* 2005;81:486-490.
5. Gill PS, Kai J, Bhopal RS, *et al.* Health Care Needs Assessment: Black and Minority Ethnic Groups. In: Raftery J (ed). *Health Care Needs Assessment. The epidemiologically based needs assessment reviews. Third Series.* Abingdon: Radcliffe Medical Press Ltd., 2006.
6. Health Survey for England 2004: Health of Ethnic Minorities. [[http://www.ic.nhs.uk/webfiles/publications/hlthsvyeng2004ethnic/HealthSurveyForEngland161205\\_PDF%20.pdf](http://www.ic.nhs.uk/webfiles/publications/hlthsvyeng2004ethnic/HealthSurveyForEngland161205_PDF%20.pdf)]
7. Abubakari AR, Bhopal RS. Systematic review on the prevalence of diabetes, overweight/obesity and physical inactivity in Ghanaians and Nigerians. *Public Health* 2008;122:173-82
8. Amoah AG, Owusu SK, Adjei S. Diabetes in Ghana: a community based prevalence study in Greater Accra. *Diabetes Res Clin Pract* 2002;56:197-205.
9. Abubakari AR, Lauder W, Agyemang C, *et al.* Prevalence and time trends in obesity among adult West African populations: a meta-analysis. *Obes Rev* 2008;9:297-311.
10. Amoah AG. Sociodemographic variations in obesity among Ghanaian adults. *Public Health Nutr.* 2003;6:751-7.
11. International Diabetes Federation. *Diabetes Atlas.* 5th ed. Brussels: International Diabetes Federation, 2011
12. Hossain P, Kawar B, El Nahas M. Obesity and diabetes in the developing world--a growing challenge. *N Engl J Med.* 2007;356:213-5.
13. Karter AJ, Ferrara A, Liu JY, *et al.* Ethnic disparities in diabetic complications in an insured population. *JAMA* 2002;287:2519-27.
14. Staiger H, Machicao F, Fritsche A, *et al.* Pathomechanisms of type 2 diabetes genes. *Endocr Rev.* 2009;30:557-85.
15. Freeman H, Cox RD. Type-2 diabetes: a cocktail of genetic discovery. *Hum Mol Genet* 2006;15:202-9.
16. Warner MJ, Ozanne SE. Mechanisms involved in the developmental programming of adulthood disease. *Biochem J.* 2010;427:333-47.
17. Hales CN, Barker DJ. Type 2 (non-insulin-dependent) diabetes mellitus: the thrifty phenotype hypothesis. *Diabetologia* 1992;35:595-601.
18. Van Speybroeck L. From epigenesis to epigenetics: the case of C. H. Waddington. *Ann N Y Acad Sci* 2002;981:61-81.

19. Plagemann A, Harder T, Brunn M, *et al.* Hypothalamic POMC promoter methylation becomes altered by early overfeeding: An epigenetic model of obesity and the metabolic syndrome. *J Physiol* 2009;15;587(Pt 20):4963-76.
20. Prentice AM. Early influences on human energy regulation: thrifty genotypes and thrifty phenotypes. *Physiol Behav* 2005;86:640-5.
21. Tobi EW, Lumey LH, Talens RP, *et al.* DANN methylation differences after exposure to prenatal famine are common and timing- and sex-specific. *Hum Mol Genet* 2009;18:4046-4053.
22. Rock, Melanie. Sweet Blood and Social Suffering: Rethinking Cause-Effect Relationships in Diabetes, Distress and Duress. *Medical Anthropology* 2003;22:131-174.
23. Manson JE, Nathan DM, Krolewski AS, *et al.* A prospective study of exercise and incidence of diabetes among US male physicians. *JAMA* 1992;268:63-7.
24. Williamson DF, Madans J, Anda RF, *et al.* Recreational physical activity and ten-year weight change in a US national cohort. *Int J Obes Relat Metab Disord* 1993;17:279.
25. Hamman RF. Genetic and environmental determinants of non-insulin-dependent diabetes mellitus (NIDDM). *Diabetes Metab Rev* 1992;8:287-338.
26. Miller WC, Koceja DM, Hamilton EJ. A meta-analysis of the past 25 years of weight loss research using diet, exercise or diet plus exercise intervention. *Int J Obes Relat Metab Disord* 1997;21:941-7.
27. Tuomilehto J, Lindström J, Eriksson JG, *et al.*; Finnish Diabetes Prevention Study Group. Prevention of type 2 diabetes mellitus by changes in lifestyle among subjects with impaired glucose tolerance. *N Engl J Med* 2001;344:1343-50.
28. Uitewaal PJ, Voorham AJ, Bruijnzeels MA, *et al.* No clear effect of diabetes education on glycaemic control for Turkish type 2 diabetes patients: a controlled experiment in general practice. *Neth J Med.* 2005;63:428-34.
29. Scott P, Rajan L. Eating habits and reactions to dietary advice among two generations of Caribbean people: a South London study, part 2. *Practical Diabetes International* 2000;17:213-216.
30. Agyemang C, Kunst AE, Stronks K. Ethnic inequalities in health: does it matter where you have migrated to? *Ethn Health.* 2010;15:216-8.
31. Fernandes A, Miguel JP. *Health and migration in the European union: better health for all in an inclusive society.* Lisbon: Instituto Nacional de Saúde Doutor Ricardo Jorge. 2009.
32. Agyemang C, Kunst AE, Bhopal R, *et al.* Diabetes prevalence in populations of South Asian Indian and African origins: a comparison of England and the Netherlands. *Epidemiology.* 2011;22:563-7.
33. World Health Organization. *Health of migrants - the way forward. Report of a global consultation.* Madrid: World Health Organization, 2010.
34. Office for National Statistics. *Estimated population resident in the United Kingdom, by foreign country of birth (Table 1.3).* London: 2009.
35. German Technical Cooperation (GTZ). *Die ghanaische Diaspora in Deutschland - Ihr Beitrag zur Entwicklung Ghanas.* Eschborn: 2009.
36. Central Bureau for Statistics. *Statistical yearbook 2009. Statistics Netherlands Facility Services.* The Hague: Henri Faasdreef 312, 2492 JP, 2009
37. Elam G, Chinouya M, Nazroo J. *Feasibility study for health surveys among black African people living in England Final report - implications for the Health Survey for England 2003.* London: Joint Health Surveys Unit National Centre for Social Research, 2001.

- 1  
2  
3 38. Agyemang C, Nicolaou M, Boateng L, *et al.* Prevalence, awareness, treatment, and control of  
4 hypertension among Ghanaian population in Amsterdam, the Netherlands: the GHAI study. *Eur*  
5 *J Prev Cardiol.* 2013;**20**:938-46.
- 6 39. Nicolaou M, Kunst AE, Busschers WB, *et al.* Differences in Body Fat Distribution Play a Role in  
7 the Lower Levels of Elevated Fasting Glucose amongst Ghanaian Migrant Women Compared to  
8 Men. *PLoS One.* 2013;**8**:e66516.
- 9 40. American Diabetes Association. Diagnosis and classification of diabetes mellitus. *Diabetes Care.*  
10 2010;**33**(Suppl 1):S62-9.
- 11 41. WHO. *Obesity: preventing and managing the global epidemic. Report of a WHO consultation.*  
12 World Health Organ Tech Rep Ser 2000;894:i.
- 13 42. Clinical Guidelines on the Identification, Evaluation, and Treatment of Overweight and Obesity in  
14 Adults -The Evidence Report. National Institutes of Health. *Obes Res* 1998;(6 Suppl 2):51S.
- 15 43. Bull FC, Maslin TS, Armstrong T. Global physical activity questionnaire (GPAQ): nine country  
16 reliability and validity study. *J Phys Act Health.* 2009;**6**:790-804.
- 17 44. Larson CO, Schlundt D, Patel K, *et al.* Validity of the SF-12 for use in a low-income African  
18 American community-based research initiative (REACH 2010). *Prev Chronic Dis.* 2008;**5**:A44
- 19 45. Williams DR, Yan Yu, Jackson JS, *et al.* Racial Differences in Physical and Mental Health: Socio-  
20 economic Status, Stress and Discrimination. *J Health Psychol.* 1997;**2**:335-51.
- 21 46. Suurmeijer TP, Doeglas DM, Briancon S, *et al.* The measurement of social support in the  
22 'European Research on Incapacitating Diseases and Social Support': the development of the Social  
23 Support Questionnaire for Transactions (SSQT). *Soc Sci Med.* 1995;**40**:1221-9.
- 24 47. Pearlin LI, Schooler C. The structure of coping. *J Health and Social Behavior* 1978;**19**:2-21.
- 25 48. Brugha TS, Cragg D. The List of Threatening Experiences: the reliability and validity of a brief  
26 life events questionnaire. *Acta Psychiatr Scand* 1990;**82**:77-81.
- 27 49. Yusuf S, Hawken S, Ounpuu S, *et al*; INTERHEART Study Investigators. Effect of potentially  
28 modifiable risk factors associated with myocardial infarction in 52 countries (the INTERHEART  
29 study): case-control study. *Lancet.* 2004;**364**(9438):937-52.
- 30 50. Kroenke K, Spitzer RL, Williams JB, *et al.* The Patient Health Questionnaire Somatic, Anxiety  
31 and Depressive Symptom Scales: a systematic review. *Gen Hosp Psychiatry* 2010;**32**: 3445-359
- 32 51. Pulvers KM, Lee RE, Kaur H, *et al.* Development of a culturally relevant body image instrument  
33 among urban African Americans. *Obes Res.* 2004;**12**:1641-51.
- 34 52. Nieuwkerk PT, de Boer-van der Kolk IM, Prins JM, *et al.* Self-reported adherence is more  
35 predictive of virological treatment response among patients with a lower tendency towards  
36 socially desirable responding. *Antivir Ther.* 2010;**15**:913-6.
- 37 53. Chan A, Cockram C, Swaminathan R. Effect of delay in separating plasma for glucose  
38 measurement upon the interpretation of oral glucose tolerance tests. *Ann Clin Biochem*  
39 1990;**27**:73-4.
- 40 54. Moscovici S. The phenomenon of social representations. In: Farr RM, Moscovici S (Eds.), *Social*  
41 *representations.* Cambridge: Cambridge University Press, 1984.
- 42 55. de-Graft Aikins, A. Healer-shopping in Africa: new evidence from a rural-urban qualitative study  
43 of Ghanaian diabetes experiences. *BMJ* 2005;**331**:737
- 44 56. Organization for Economic Cooperation and Development. Table A.1.1. *Inflows of Foreign*  
45 *Population into Selected OECD Countries.* *International Migration Outlook.* Sopemi, 2006.
- 46  
47  
48  
49  
50  
51  
52  
53  
54  
55  
56  
57  
58  
59  
60

- 1  
2  
3 57. Agyemang C, de-Graft Aikins A, Bhopal R. Ethnicity and cardiovascular health research: pushing  
4 the boundaries by including comparison populations in the countries of origin. *Ethn Health*  
5 2012;**17**:579-96.  
6  
7  
8  
9

10 Figure legend  
11

12 **Figure 1: A conceptual model for the RODAM project.**  
13  
14  
15  
16  
17  
18  
19  
20  
21  
22  
23  
24  
25  
26  
27  
28  
29  
30  
31  
32  
33  
34  
35  
36  
37  
38  
39  
40  
41  
42  
43  
44  
45  
46  
47  
48  
49  
50  
51  
52  
53  
54  
55  
56  
57  
58  
59  
60

For peer review only



**Rational and cross-sectional study design of the Research on Obesity and Type 2 Diabetes among African Migrants: The RODAM study**

Charles Agyemang<sup>1\*</sup>, Erik Beune<sup>1</sup>, Karlijn Meeks<sup>1</sup>, Ellis Owusu-Dabo<sup>2</sup>, Peter Agyei-Baffour<sup>2</sup>, Ama de-Graft Aikins<sup>3</sup>, Francis Dodoo<sup>3</sup>, Liam Smeeth<sup>4</sup>, Juliet Addo<sup>4</sup>, Frank Mockenhaupt<sup>5</sup>, Stephen Amoah<sup>5</sup>, Matthias B. Schulze<sup>6</sup>, Ina Danquah<sup>6</sup>, Jochen Spranger<sup>7</sup>, Mary Nicolaou N<sup>1</sup>, Kirstin Klipstein-Grobusch<sup>8,9</sup>, Tom Burr<sup>10</sup>, Peter Henneman<sup>11</sup>, Marcel M. Mannens<sup>11</sup>, Jan P. van Straalen<sup>12</sup>, Silver Bahendeka<sup>13</sup>, AH Zwinderman<sup>14</sup>, Anton E. Kunst<sup>1</sup>, Karien Stronks<sup>1</sup>.

1. Department of Public Health, Academic Medical Centre (AMC), University of Amsterdam, Amsterdam, The Netherlands.
2. Faculty of Science, Kwame Nkrumah University of Science and Technology, Kumasi, Ghana.
3. The Regional Institute for Population Studies: University of Ghana, Legon, Ghana.
4. Department of Non-communicable Disease Epidemiology, London School of Hygiene and Tropical Medicine, London, UK.
5. Institute of Tropical Medicine and International Health, Charité – Universitätsmedizin Berlin, Berlin, Germany.
6. Department of Molecular Epidemiology, German Institute of Human Nutrition (DIfE), Potsdam-Rehbruecke, Nuthetal, Germany.
7. Department of Endocrinology, Diabetes and Nutrition, Charité – Universitätsmedizin Berlin, Germany.
8. Julius Center for Health Sciences and Primary Care, University Medical Center, Utrecht, Netherlands.
9. Division of Epidemiology and Biostatistics, School of Public Health, Faculty of Health Sciences, University of the Witwatersrand, Johannesburg, South Africa.
10. Source BioScience, Nottingham, UK.
11. Department of Clinical Genetics, Academic Medical Centre, Amsterdam, The Netherlands.
12. Department of Clinical Chemistry, Academic Medical Centre, Amsterdam, The Netherlands.
13. International Diabetes Federation, Africa Region, Kampala, Uganda.
14. Department of Clinical Epidemiology, Bioinformatics, and Biostatistics, Academic Medical Centre, University of Amsterdam, Amsterdam, The Netherlands.

---

\*Correspondence to: Dr Charles Agyemang, Department of Public Health, Academic Medical Centre, University of Amsterdam, Meibergdreef 9, 1105 AZ Amsterdam, The Netherlands, Tel: 0031 20 5664885, Fax: 0031 20 6972316. Email: c.o.agyemang@amc.uva.nl

## Abstract

**Introduction:** Obesity and type 2 diabetes (T2D) are highly prevalent among African migrant compared to European descent populations. The underlying reasons still remain a puzzle. Gene-environmental interaction is now seen as a potential plausible factor contributing to the high prevalence of obesity and T2D, but has not yet been investigated. The overall aim of the RODAM (Research on Obesity and Diabetes among African Migrants) project is to understand the reasons for the high prevalence of obesity and T2D among Sub-Saharan Africans in diaspora by (a) studying the complex interplay between environment (e.g. lifestyle), healthcare, biochemical and (epi)genetics and their relative contributions to the high prevalence of obesity and T2D; (b) to identify specific risk factors within these broad categories to guide intervention programmes; and (c) to provide a basic knowledge for improving diagnosis and treatment.

**Methods and Analysis:** RODAM is a multi-centre cross-sectional survey among homogenous Sub-Saharan African participants (i.e. Ghanaians) aged >25 years living in rural and urban Ghana, Netherlands, Germany, and the UK (<http://rod-am.eu/>). Standardised data on the main outcomes (obesity and T2D), environmental factors (e.g. lifestyle, socio-economic factors, psychosocial stress and healthcare access), genetics and biochemical factors are collected in all locations. The aim is to recruit 6,250 individuals comprising five subgroups of 1,250 from each site (i.e. rural-Ghana, urban-Ghana, Netherlands, Germany and UK). In Ghana, Kumasi and Obuasi (urban stratum) and 15 villages in the Ashanti region (rural stratum) are served as recruitment sites. In Europe, Ghanaian migrants are selected through the municipality or Ghanaian organisations registers.

**Ethics and dissemination:** Ethical approval has been obtained in all sites. This paper gives an overview of the rationale, conceptual framework and methods of the RODAM study. The differences in obesity and T2D prevalence within Ghana on the one hand, and between three European countries on the other, will allow us to gain insight into environmental, biochemical and (epi)genetic factors contributing to the occurrence of obesity and T2D among these populations. The new insights will inform targeted intervention and prevention programmes, and provide a basis for improving diagnosis and treatment in these populations and beyond.

### Abbreviations:

RODAM: Research on Obesity and Diabetes among African Migrants

T2D: Type 2 Diabetes

CVD: Cardiovascular disease

EA: Enumeration Area

GPAQ: Global Physical Activity Questionnaire

FPQ: Food Propensity Questionnaire

ABI: Ankle-Brachial-Index

BIA: Bioimpedance Analysis

GWAS: Genome-wide association study

## Introduction

Ethnic minority and migrant populations in Europe have been disproportionately affected by both obesity and diabetes compared with the host European origin populations (henceforth, Europeans).<sup>1-4</sup> The prevalence of type 2 diabetes (T2D), for example, is about three to five times higher than in Europeans.<sup>4</sup> They also develop T2D at a younger age; and they have higher morbidity and mortality from T2D and related complications such as cardiovascular disease (CVD) than European populations.<sup>4,5</sup> The little available information suggests that sub-Saharan Africa (SSA) migrants are particularly affected by obesity and T2D.<sup>3</sup> In the Health Survey for England (HSE) 2004, the prevalence rates of T2D were 16.2% and 6.0% in sub-Saharan African men and women aged  $\geq 35$  years compared with 5.1% and 2.4% in English general population men and women, respectively.<sup>6</sup>

Obesity and T2D prevalence rates are not only escalating among SSA migrants, but also in their home countries. The increasing levels of obesity and T2D in SSA countries have been unprecedented and pose huge challenges for many countries. While T2D seemed to be virtually absent, for example, in West Africa in the 1960s and 1980s (0.2-1.7%), today it has become a major health problem affecting almost 7% of the adult population.<sup>7-10</sup> Projections indicate that the number of T2D patients in SSA will double from 14.7 million in 2011 to 28 million in 2020,<sup>11</sup> undoubtedly among one of the highest growth rates of T2D worldwide.<sup>11,12</sup> This correlates with the simultaneous increase of obesity in the same region.<sup>7</sup> A systematic review found that the prevalence of obesity in urban West Africa has more than doubled over 15 years.<sup>9</sup> The serious cardiovascular complications of obesity and T2D could overwhelm SSA countries that are already straining under the burden of communicable diseases.

The reasons for the increased susceptibility of ethnic minority groups and migrants to obesity and T2D are poorly understood. Increased T2D prevalence and complications in African populations both in SSA and industrialised countries have been attributed to delayed diagnosis and poor management due to low socioeconomic status. However, ethnic differences persist even when demographic, socioeconomic status, behavioural and clinical parameters have been taken into account,<sup>13</sup> suggesting that other factors such as genetic predispositions might be important. The validity of this finding, nonetheless, is limited because of the heterogeneity of migrants studied so far. Heritability estimates for T2D range up to 40%,<sup>14-15</sup> but genetic variations thus far identified, contribute only a small fraction of the inherited risk.<sup>16</sup> While genetic factors alone cannot explain the increasing prevalence of obesity and T2D, it is clear that the high prevalence of obesity and T2D is a result of a complex interplay of environmental and genetic factors that are likely to vary in different settings and among different population groups. Genetic predispositions and interactions between environmental and genetic factors may be involved in the onset and development of diseases such as obesity and T2D among migrant populations. The 'thrifty genotype' and 'thrifty phenotype' hypotheses are considered to be the underlying mechanism of the gene-environment interaction contribution to disease susceptibility.<sup>17-21</sup> While gene-environment interactions may play an important role in disease susceptibility, research in this area, particularly within the context of human migration is in its infancy.

The high levels of obesity and T2D among migrant populations may also be influenced by lifestyle changes following migration<sup>3</sup> as well as psychological stress.<sup>22</sup> Evidence from cohort studies demonstrate the importance of lifestyle factors such as physical inactivity and smoking on obesity and T2D.<sup>23-27</sup> However, among migrant populations, interventions to reduce obesity and T2D have often been ineffective,<sup>28</sup> and efforts often fail to meet the specific needs of ethnic minority and migrant populations.<sup>29</sup> The local circumstances of ethnic minority and migrant populations, such as socioeconomic development of the groups, race relations and access to health care and preventive

1  
2  
3 services, may differ greatly among industrialised countries.<sup>30-31</sup> These differential contexts can  
4 influence health behaviour, psychosocial stress and health care use among ethnic minority and migrant  
5 groups, and subsequently lead to differences in CVD health outcomes between similar populations  
6 living in different countries.  
7

8  
9 The RODAM project - an European Commission funded project – aims to understand the reasons for  
10 the high prevalence of obesity and T2D among African migrants by (a) studying the complex interplay  
11 between environmental exposures and genetics and their relative contributions to the high prevalence  
12 of obesity and T2D; (b) to identify specific risk factors within these broad categories to guide  
13 intervention programmes, and (c) to provide a basic knowledge for improving diagnosis and treatment.  
14 A conceptual model of the RODAM project is presented in Figure 1.<sup>32</sup> It shows that following  
15 migration, migrants may be exposed to varied contexts, such as different opportunities for socio-  
16 economic development, different availability of food supply, different health systems and policies, and  
17 different cultural traditions; and these differences may influence their health behaviour, physical and  
18 psychosocial stress and subsequently lead to differences in obesity and T2D risks.  
19  
20  
21

## 22 **Methods**

23  
24 To achieve RODAM study goals, a multi-disciplinary consortium of researchers from Europe  
25 (University of Amsterdam, Utrecht University, London School of Hygiene and Tropical Medicine,  
26 Charité - Universitätsmedizin Berlin, German Institute of Human Nutrition) and Africa (University of  
27 Ghana, Kwame Nkrumah University of Science and Technology and the International Diabetes  
28 Federation (IDF), African region) with broad experience on chronic diseases in Africans and African  
29 migrants have joined forces. As a central feature of the RODAM project, at all study sites, highly  
30 standardised protocols of quantitative and qualitative assessments are applied for participant  
31 recruitment and topic-related investigations.  
32  
33

### 34 *Study Population*

35  
36 Assessing the role of gene-environmental interactions in risk factors, such as obesity and T2D, among  
37 migrant populations requires a highly standardised approach and relatively homogeneous migrating  
38 and non-migrating populations. For this reason, we concentrate on a relatively homogenous SSA  
39 migrant population to enable comparisons of the prevalence of obesity and T2D between SSA  
40 migrants living in different European countries and their compatriots living in rural and urban SSA  
41 as outlined in the *WHO Global Consultation on Migrant Health* report.<sup>33</sup> Consequently, adult Ghanaians  
42 (aged  $\geq 25$  years) are recruited in rural and urban Ghana, and in the cities of Amsterdam, Berlin and  
43 London. Ghanaians are one of the largest SSA migrant groups in Europe.<sup>34-36</sup> The 2009 estimates by  
44 the Office for National Statistics recorded 93,000 Ghanaian-born people living in the UK. The  
45 majority of Ghanaians in the UK are concentrated in London boroughs of Southwark, Lambeth,  
46 Newham, Hackney, Haringey, Lewisham, Croydon, Merton and Brent.<sup>34</sup> In Germany, 22,000 people  
47 are officially registered as Ghanaians the majority of whom are concentrated in Berlin, Hamburg and  
48 North-Rhine Westphalia.<sup>35</sup> In the Netherlands, in 2009 there were approximately 20,000 officially  
49 recorded Ghanaians. The majority of these are concentrated in southeast Amsterdam.<sup>36</sup>  
50  
51  
52

## 53 **Recruitment of the study participants**

### 54 *Engagement of Ghanaian community*

55  
56  
57  
58  
59  
60

1  
2  
3 Previous work in the Netherlands and a feasibility study among African communities in the UK show  
4 that involvement of the community leaders enhances study participation and may help prevent a low  
5 response rate relating to language barriers and lack of understanding about the relevance of the  
6 study.<sup>37-38</sup> The RODAM project therefore involves the Ghanaian community leaders in all sites. This  
7 include working with religious communities (e.g., churches, mosques), endorsement from local key  
8 figures, and establishing relationships with health care organisations that serve these groups. In  
9 addition, the project team provides information about the study via local media aim at the Ghanaian  
10 population (e.g., Ghanaian radio and TV stations).  
11

12  
13 Because of differences in the population registration systems across European countries as well as in  
14 Ghana, different approaches are needed for the recruitment of the study populations across locations.  
15 For example, there is a population register in the Netherlands where the Ghanaian migrants could be  
16 identified and randomly selected for the study. In Ghana, the UK and Germany, the situation is quite  
17 different as there are no population registers that will allow for these easy identification of these  
18 populations. It is important, however, to adopt the recruitment strategies that are as comparable as  
19 possible across locations. Below we describe the various recruitment strategies in each site..  
20  
21

#### 22 23 *Recruitment strategy in Ghana*

24  
25 In Ghana, two cities (Kumasi and Obuasi) and 15 villages in the Ashanti region are served as the  
26 urban and rural recruitment sites. The initial sampling frame was the list of enumeration areas in the  
27 Ashanti region from the 2010 census. A multistage random sampling procedure was adopted to arrive  
28 at the sampling of 30 Enumeration Areas (EAs). Enumeration areas were stratified, weighted and a  
29 random sample of rural and urban enumeration areas selected. There are over two thousand urban and  
30 more than 1000 rural EAs, respectively. The first stage was to group the districts into two main  
31 categories: districts with a high number of urban (Kumasi and Obuasi) and districts with a high  
32 number of rural EAs. The next stage of sampling was to put the EAs together in each of the categories  
33 and take a weighted random sample of 10 for Kumasi and 5 for Obuasi, respectively. The procedure  
34 was repeated for the rural EAs by adding all the EAs in the selected districts and weighted from the  
35 first stage together after which a simple random sample procedure was adopted to select the total  
36 number of rural EAs (15) required for the study. Letters are sent to all selected health and community  
37 authorities to notify them of the start of the study. We send team members to the various communities  
38 to stay among them. Once within the community, the team then organise mini clinics in the field for a  
39 period of 1-2 weeks depending on the sampled population and responsiveness of respondents.  
40  
41  
42  
43

#### 44 45 *Recruitment strategy in the Netherlands*

46  
47 In the Netherlands, Ghanaian subjects were randomly drawn from Amsterdam Municipal Health  
48 register. This register contains data on country of birth of citizens and their parents, thus allowing for  
49 sampling based on the Dutch standard indicator for ethnic origin. All selected subjects aged  $\geq 25$  years  
50 were sent a written invitation combined with written information regarding the study and a opting out  
51 response card. Participants are reminded by phone or home visit after 2 weeks if there is no response.  
52 After a positive response, an appointment for physical examination at a local health centre is made  
53 over the phone follow by a confirmation letter of the appointment and a digital or paper version of the  
54 questionnaire (depending on the preference of the subject) is sent to the subject's home address.  
55  
56  
57  
58  
59  
60



### *Recruitment strategy in the UK*

The UK has no population register for migrant groups. Consequently, Ghanaian organisations are served as the sampling frame. Lists of these organisations have been obtained from the Ghanaian Embassy and the Association of Ghanaian Churches in the UK in the boroughs known to have the greatest concentration of Ghanaians. Lists of all members of their organisations if available have also been requested, from which a number of all participants aged  $\geq 25$  years are invited to participate in the study. The selected subjects receive a written invitation combined with written information regarding the study and a opting out response card. Participants are sent a confirmation letter of the appointment for a physical examination at a local health centre, church or community centre, including a digital or paper version of the questionnaire (depending on the preference of the subject) if they agree to participate in the study.

### *Recruitment strategy in Germany*

In Berlin, a list of Ghanaian individuals (born in Ghana, or Ghanaian passport holders) was provided by the registration office and that was supplemented with contact details of members of Ghanaian organisations and churches in Berlin. From this combined list, all participants aged  $\geq 25$  years have been invited to participate in the study. In addition, a written invitation combined with written information regarding the study and a response card has been sent to the selected subjects. Participants are reminded after 2 weeks if there is no response. After a positive response, the participants are contacted by phone to schedule date and location of the interview with a trained research assistant or opt for the digital online version. Subsequent to the completion of the questionnaire, a date for physical examination is then scheduled.

### *Ethical approval*

Ethical approval of the study protocols has been requested at all sites from the respective ethics committees in Ghana (School of Medical Sciences/Komfo Anokye Teaching Hospital Committee on Human Research, Publication & Ethical Review Board), Netherlands (Institutional Review Board of the AMC, University of Amsterdam), Germany (Ethics Committee of Charite-Universitätsmedizin Berlin) and the UK (London School of Hygiene and Tropical Medicine Research Ethics Committee) before data collection began in each country. Informed written consent is also obtained from each participant prior to the enrolment in the study. In addition, an external independent Ethical advisor has been appointed by the RODAM Steering Committee to oversee the ethical issues in RODAM study.

### *Power and Data analysis*

In the presented study we aim to sample 6,250 individuals comprising five subgroups of 1,250 each from the 5 locations. For phenotypic, genetic and epigenetic studies subsets are selected. In order to estimate the statistical power with regard to different sample sizes in the three types of data we evaluated three distinct types of statistical power calculations with regard to the type of survey.

Phenotypic association: For the phenotypic association analysis we assumed a prevalence of T2D of  $< 5\%$  in rural Ghana,  $6-7\%$  in urban Ghana and  $> 12\%$  in Europe.<sup>32,39</sup> For obesity we assumed a prevalence of  $< 5\%$  in rural Ghana,  $17\%$  in urban Ghana, and  $30\%$  in Europe.<sup>2,39</sup> In general, we aim for a power of 0.90 with  $\alpha=0.05$  (incl. Bonferroni correction). Using these parameters a sample size of approximately 1230 is needed in the rural Ghana, urban Ghana, Amsterdam, London and Berlin subsets to detect a difference between the group proportions of 5%. T2D was defined as fasting

1  
2  
3 plasma glucose  $\geq 7$  mmol/L, or pre-existing anti-diabetic medication or HbA1c  $\geq 6.5\%$ .<sup>40</sup> Generalised  
4 obesity was defined as body mass index  $\geq 30.0$  kg/m<sup>2</sup>, and central obesity as a waist circumferences  
5  $>102$  cm in males or  $>88$  cm in females.<sup>41-42</sup>  
6

7 Genetic association: The present study aims to genotype a substantial part of the total sample among  
8 diabetics (cases) and non-diabetes (controls). The genotyping will be based on a standard SNP array  
9 platform suitable for performing genome wide association study (GWAS) as well as candidate gene  
10 analysis or related approaches. Using the statistical power calculator on binary traits for a case –  
11 control study design (S. Purcell; <http://pngu.mgh.harvard.edu/>), assuming an allele frequency of 0.25,  
12 a prevalence of 16%, a relative risk of 1.3 and 1.6 (Aa and AA rep.), a D' prime of 1, the number of  
13 cases of 1000 (1:2 case control ratio) and a type I error rate of 0.05, approximately 540 cases are  
14 considered sufficient to obtain a power of 0.90. Although the latter necessary sample size is covered  
15 by our study, it should be noted that correction for multiple tests, i.e. if more than one genetic variant  
16 is tested, is not considered here. Nevertheless, candidate gene or related association approaches within  
17 this single study setup have sufficient statistical power to detect moderate and low effect sizes.  
18  
19

20  
21 Epigenetic association: To explore the influence of epigenetic factors on the main outcomes, we will  
22 first assess the differences in methylation levels among Ghanaians living in rural-Ghana, urban and  
23 Europe and their relative contributions to the differences to obesity and T2D that may be observed.  
24 With study power of 0.80 and  $\alpha=0.05$  (and SD  $\pm 0.10\%$ ), at least 64 people per group are needed to  
25 detect a mean percentage difference in methylation density of 5%. When multiple correction is taken  
26 into account, about 300 individuals per group participants are needed. Epigenome-wide analysis will  
27 be performed. Association analysis of the DNA-methylation profiles and obesity and T2D and related  
28 phenotypes will subsequently be performed. Promising loci will then be validated using next  
29 generation bisulphite sequencing.  
30  
31

32  
33 Simple tables, proportions, mean and median values will be used to examine the data. Multivariable  
34 linear and logistics regression analyses will be used to assess the differences and to identify specific  
35 relevant factors and their relative contribution to the differences in body indices and fasting glucose  
36 (both continuous and binary traits) between Ghanaian migrants and non-migrants.  
37  
38

### 39 **Data collection**

40  
41 Data collection is composed of questionnaire/interviews, physical examination and biological samples.  
42 The methods for data collection in RODAM are identical in all locations following standard operating  
43 procedures and applying standardised tools. Questionnaires have been adapted to the local  
44 circumstances in Ghana, Netherlands, UK, and Germany where needed. For example, for all sites  
45 modification of questions with respect to educational system or social security system were made.  
46 Before data collection, a two-day training course in the Netherlands was organised for all those  
47 involved in data collection, on the overall project's procedures. The training involved the  
48 administration of the different questionnaires, physical examinations, processing of blood and urine  
49 samples in the laboratory and transport and storage of samples. The work package leaders, in turn,  
50 train all recruitment team members in each site on all aspects of study. Interviewers are recruited  
51 among Ghanaian-speaking residents in Europe, are introduced to the aims and procedures of the study,  
52 and are instructed and trained on the use of the questionnaires. Research assistants also receive the on-  
53 line tutorial for the Oracle Clinical data entry system. The performance of each interviewer or research  
54 assistant is monitored during the initial interviews and physical examinations. Feedback is provided  
55  
56  
57  
58  
59  
60



and changes initiated if needed. The RODAM coordinator monitors data collection at all study sites to ensure standardisation of methods.

### Questionnaire/interviews

All the participants who agree to participate in the study receive an appointment for a structured interview. The interviews are conducted by trained interviewers of Ghanaian background and last for about 60-120 minutes. To increase participation rate, the participants are given a range of options including interviews in participants' homes, digital or paper version of the questionnaire depending on the preference of the participant. The interviewers conduct the interviews in the preferred language of the respondent either in English, German, Dutch or Ghanaian languages. The interview is based on a structured health questionnaire, and contains questions on demographics (age, sex, marital status, household composition, religion), socio-economic position (education level and parental education, employment status and parental employment status, occupational status and wealth), migration related factors (pre-migration history, age at first migration, age at arrival in current location, duration of residence, cultural distance and ethnic identity), psychosocial vulnerability (perceived discrimination, social support, mastery, recent negative life events and current depression), health status (self-reported general health and presence and history of diseases, family history of diseases), health care use (visit to GP, specialists, psychological care, alternative health care) and health behaviour (e.g. dietary behaviour, physical activity, alcohol and smoking, perceived body weight and body shape and adherence to medications) by using appropriate validated instruments (Table 1). For example, physical activity is measured using the WHO Global Physical Activity Questionnaire (GPAQ) version 2.<sup>43</sup> Dietary behaviour is determined by a Food Propensity Questionnaire (FPQ), specifically developed in RODAM to include Ghana-specific foods. In addition, a 24 hour dietary recall questionnaire will be administered to a subset of the study population in each site (n=5\*100).

**Table 1: Variables measured in the RODAM questionnaire**

| Themes                              | Variable/Measure                                                                                                                                                                                                                                                                    | Questionnaire instrument/measures                                                                                                                                                                                                                                                                                                                                        |
|-------------------------------------|-------------------------------------------------------------------------------------------------------------------------------------------------------------------------------------------------------------------------------------------------------------------------------------|--------------------------------------------------------------------------------------------------------------------------------------------------------------------------------------------------------------------------------------------------------------------------------------------------------------------------------------------------------------------------|
| Demographics                        | Age, sex, marital status, religion, tribe, locality                                                                                                                                                                                                                                 | -                                                                                                                                                                                                                                                                                                                                                                        |
| Socioeconomic status                | <ol style="list-style-type: none"> <li>1. Education</li> <li>2. Employment status</li> <li>3. Wealth</li> <li>4. Parental socio-economic status</li> </ol>                                                                                                                          | <ol style="list-style-type: none"> <li>1. Education attainment</li> <li>2. Nature of work</li> <li>3. Household index; Wealth index (only in Ghana)</li> <li>4. Father and mother education attainment and profession</li> </ol>                                                                                                                                         |
| Migration related factors           | Generation, duration of residence in Europe, religion, cultural distance, migration history                                                                                                                                                                                         | -                                                                                                                                                                                                                                                                                                                                                                        |
| Health status                       | <ol style="list-style-type: none"> <li>1. General health</li> <li>2. Presence and history of diseases and family history of diseases</li> </ol>                                                                                                                                     | <ol style="list-style-type: none"> <li>1. SF-12<sup>44</sup></li> <li>2. Various health conditions</li> </ol>                                                                                                                                                                                                                                                            |
| Psychosocial factors                | <ol style="list-style-type: none"> <li>1. Perceived discrimination</li> <li>2. Perceived social support</li> <li>3. Dealing with everyday problems</li> <li>4. Recent experiences (stressful life events)</li> <li>5. Psychological stress</li> <li>6. Recent well-being</li> </ol> | <ol style="list-style-type: none"> <li>1. Everyday Discrimination Scale<sup>45</sup></li> <li>2. SSQT Satisfaction Emotional Support subscale<sup>46</sup></li> <li>3. Mastery<sup>47</sup></li> <li>4. List of Threatening Experiences<sup>48</sup></li> <li>5. 2 items from INTERHEART<sup>49</sup></li> <li>6. Patient Health Questionnaire-9<sup>50</sup></li> </ol> |
| Health care use and related factors | Visits to GP, specialists, psychological care, alternative health care                                                                                                                                                                                                              | Last four weeks                                                                                                                                                                                                                                                                                                                                                          |

| Health behaviour |                                         |                                                                              |
|------------------|-----------------------------------------|------------------------------------------------------------------------------|
|                  | 1. Smoking                              | 1. –                                                                         |
|                  | 2. Alcohol intake                       | 2. -                                                                         |
|                  | 3. Physical activity                    | 3. WHO Global Physical Activity Questionnaire (GPAQ) version 2 <sup>43</sup> |
|                  | 4. Dietary behaviour                    | 4. Ghana specific FPQ, 24h dietary recalls for sub-sample (n=5*100)          |
|                  | 5. Perceived body weight and body shape | 5. Pulvers Instrument to measure body image <sup>51</sup>                    |
|                  | 6. Adherence to medication              | 6. Self-reported adherence <sup>52</sup>                                     |

All participants who complete the questionnaire are invited for physical examination in the local research clinic or in a health centre. At the start of the visit, the study and the procedures involved are explained to each participant and informed consent is signed if not already done so at home. After informed consent is given, physical measurements are made and biological samples, fasting blood and urine samples are collected.

### Physical measurements

Physical examinations are performed with validated devices according to standardised operational procedures. Physical examinations comprise assessment of anthropometrics (weight, height, trunk, waist circumference and hip circumference), Bioimpedance Analysis (BIA), blood pressure and ankle-arm-index measures (Table 2). The portable stadiometer SECA 217 is used for height measurement, the SECA 877 for weight measurement, measuring tape for abdominal and hip circumference and BODYSTAT<sup>®</sup> 1500 MDD analyzer for BIA. Blood pressure is measured three times using validated semi-automated device (The Microlife<sup>®</sup> WatchBP<sup>®</sup> home) with appropriate cuffs in a sitting position after at least five minute rest. Ankle-Brachial-Index (ABI) is measured with The Microlife<sup>®</sup> WatchBP Office ABI with appropriate cuffs in a supine position after at least ten minutes rest. Each participant receives a summary of his/her main results accompanied by an explanation and the recommendation to contact his/her General Practitioner (GP) if the results are abnormal.

**Table 2: Physical examination variables measured in the RODAM**

| Themes               | Measures                                                                                                                 | Instrument                                                                                                                 |
|----------------------|--------------------------------------------------------------------------------------------------------------------------|----------------------------------------------------------------------------------------------------------------------------|
| Anthropometrics      | 1. Weight<br>2. Height & Trunk<br>3. waist circumference<br>4. Hip circumference<br>5. Body fat (Bio Impedance Analysis) | 1. SECA 877<br>2. SECA 217<br>3. Measuring tape<br>4. Measuring tape<br>5. BODYSTAT <sup>®</sup> 1500 MDD analyzer for BIA |
| Blood pressure       | Systolic and diastolic blood pressure, measured 3 times in a sitting position after at least 5 minutes rest              | The Microlife <sup>®</sup> WatchBP <sup>®</sup> home                                                                       |
| Ankle-Brachial-Index | Ankle-Brachial-Index, measured in a supine position after at least ten minute rest                                       | The Microlife <sup>®</sup> WatchBP Office ABI                                                                              |

### Biological material

#### *Blood samples*

Fasting venous blood samples are collected by trained research assistants in all sites. All blood samples are manually processed and aliquoted immediately after collection by a trained technician or research assistant according to standard operational procedures, and then temporarily stored at the

1  
2  
3 local research location. Immediate processing and cryopreservation at the research location has the  
4 advantage of preserving any highly labile molecules in the samples. Standardized procedures ensure  
5 that each sample is collected, handled, processed, transported, and stored in the same way across sites.  
6 The samples are then transported to the respective local laboratories (Durrer Center for Cardiogenetic  
7 Research at the AMC, Amsterdam; Kwame Nkrumah University of Science and Technology, KCCR,  
8 Kumasi, Faculty of Infectious and Tropical Diseases, LSHTM, London & Institute of Tropical  
9 Medicine and International Health, Berlin) where samples are checked, registered, and stored at -80°C.  
10 These samples include EDTA whole blood, heparin plasma and serum. In addition, on the spot, fasting  
11 plasma glucose level is assessed by validated hand held device (Accu-Chek Performa meter + Accu-  
12 Chek Inform II test strip (Roche, Germany) in all sites to provide accurate glucose determination as  
13 blood glucose concentration tends to decline over time in blood samples.<sup>53</sup>  
14  
15

### 16 17 *Morning urine sample*

18 Participants are asked to bring the first early morning urine in a clean jar. The urine sample is tested  
19 with a dipstick in the Urysis 1100 (Combur 7, Roche) on the spot, to determine pH, glucose, ketones,  
20 leucocytes, nitrite, protein and erythrocytes. One sample per participant is transported, together with  
21 the blood samples, to respective local laboratory and stored at -80°C.  
22  
23

### 24 *Transfer of biological material to dedicated centres for biochemical analyses and genotyping*

25 From the local research centres the two aliquoted samples, one urine sample and a 2 ml EDTA are  
26 then transported to Berlin for biochemical analyses including glucose metabolism (fasting glucose,  
27 HbA1c, insulin), lipid profile (total cholesterol, HDL-cholesterol, LDL-cholesterol and triglycerides),  
28 electrolytes and renal function (creatinine, albumin, sodium, potassium, calcium), uric acid  
29 metabolism (uric acid), liver metabolism (alanine transaminase (ALT), aspartate aminotransferase  
30 (AST), gamma-glutamyl transpeptidase (GGT)), oxidative status and iron metabolism (ferritin) and  
31 inflammation (hsCRP); and a 4 ml EDTA whole blood sample was transported to Nottingham for  
32 DNA extraction and genotyping. Shipping of the samples from European sites is done using styrofoam  
33 boxes filled with dry ice and from Ghana in dry shippers filled with liquid nitrogen. Numerous factors  
34 including temperature, packaging, courier, sample type, import/export requirements, seasons, costs,  
35 and transit time/ship days can affect biological specimen integrity during transportation both  
36 domestically and internationally. Hence, staff involved with shipping the specimens has been trained  
37 in order to minimise factors that might affect the integrity of the specimens. In addition, training  
38 regarding legal or regulatory aspects of shipment of specimens such as Material Transfer Agreement  
39 (MTA) has been given. Each centre maintains a shipment log to record the receipt and dissemination  
40 of shipments sent from the centre. Each shipment entry is given a unique shipment number.  
41  
42  
43  
44  
45  
46

### 47 **Qualitative interviews of perception and knowledge of obesity and T2D**

48 Interventions to reduce obesity and T2D have often been ineffective particularly in migrant  
49 populations.<sup>28</sup> This may, in part, relate to poor perceptions and knowledge about both conditions.  
50 Access to preventive and curative services may depend on a wide range of factors including  
51 knowledge of services and how to use them, health beliefs and attitudes, language barriers, the  
52 sensitivity of services to differing needs and the quality of care provided. Gaining in-depth insight into  
53 these factors requires qualitative methodology. Thirty-two individual interviews with people with  
54 diabetes and 8 focus groups (including up to 8 participants per group) with lay healthy individuals will  
55  
56  
57  
58  
59  
60

1  
2  
3 be held at each location. Segmentation categories for purposive sampling for people with diabetes are  
4 gender, duration of diabetes, BMI status and age. Each individual interview and focus group interview  
5 is conducted by trained interviewers using the same themes across all sites and had duration of 60-90  
6 minutes. Interviews are recorded, transcribed and analysed using qualitative data software. A coding  
7 framework of themes is developed based on the RODAM theoretical framework and social  
8 representations theory.<sup>54,55</sup> Coding is done inductively and deductively through a constant comparative  
9 approach. All transcripts are coded separately by two independent researchers and systematically  
10 discussed and compared for inter-rater reliability.  
11  
12

### 13 14 15 **Current status of the study**

16  
17 The RODAM project study is currently enrolling participants from five localities in 4 countries. As of  
18 January 2014, we have examined and interviewed 3868 participants (rural n=1057, urban Ghana  
19 n=863, Amsterdam n=1011, London n=597 and Berlin n=340) who fulfilled the RODAM eligibility  
20 criteria. Blood and urine samples from these participants have been stored at the local sites in Ghana,  
21 Amsterdam, London and Berlin. Part of these samples have been successfully shipped from the study  
22 sites to Charité – Universitätsmedizin Berlin for biochemical analyses, and to Scource Bioscience in  
23 Nottingham for DNA extraction. Genotyping will commence once all the data collection is completed.  
24 The data collection for the qualitative part of the project is ongoing in rural and urban Ghana,  
25 Amsterdam and London. Database has been built and the outline of the data storage-structure has been  
26 defined. The data analysis will begin once the data cleaning is completed.  
27  
28  
29  
30  
31

### 32 **Discussion**

33  
34 SSA migrants to Europe belong to one of the fastest growing migrant groups in Europe today.<sup>56</sup> The  
35 unprecedented high levels of cardiovascular diseases and related risk factors, such as obesity and T2D,  
36 have huge clinical care and public health implications. Consequently, the need to get detailed insights  
37 into the possible underlying determinants of obesity and T2D and related complications to help  
38 support the preventive efforts as well as clinical management is increasingly being recognised. This is  
39 particularly so in major European cities where some of these populations form a major part of the  
40 patient population.<sup>31</sup> Simultaneously, African countries are facing huge challenges regarding obesity  
41 and T2D and related complications.<sup>7,9</sup> This issue was recently highlighted in the meeting of the general  
42 assembly of the United Nations on Non-Communicable Diseases in 2011 as an important epidemic of  
43 our times: (<http://www.un.org/en/ga/president/65/issues/ncdiseases.shtml>). Unfortunately, the  
44 established health education and lifestyle interventions mainly in the European host populations may  
45 not be applied in migrant populations and other world regions such as Africa because of differences in  
46 susceptibility, nutrition, social circumstances and culture. Still, both in Africa and among African  
47 migrants, data are highly fragmentary and based on heterogeneous populations. Consequently, the  
48 magnitude of the problem is uncertain and the relative contribution of risk factors is undefined. Thus,  
49 it is difficult to set rational priorities for targeted health interventions and policies, and to monitor  
50 progress towards set goals. Knowledge on health-related outcomes that are directly associated with the  
51 migration process will allow for the most effective and appropriate use of interventions, efforts and  
52 investments to improve and promote the health of these populations.<sup>51</sup>  
53  
54  
55  
56  
57  
58  
59  
60

1  
2  
3 Comparative studies such as RODAM have an enormous potential for both migrant populations and  
4 for the countries from which they have migrated from. For migrant populations, it provides indications  
5 of how exposure to different environmental circumstances might influence health outcomes. This is  
6 highly relevant in that the industrialised countries themselves differ greatly in terms of opportunities  
7 for socio-economic development of the migrant groups, race relations, and access to health care and  
8 preventive services.<sup>57</sup> These differential contexts can undoubtedly influence health behaviour and  
9 health care use among migrant groups, and subsequently lead to differences in health outcomes  
10 between similar migrant populations living in different countries.<sup>30,32</sup> For the countries of origin, the  
11 rapid increases of obesity and T2D following migration to high-income countries give a clear  
12 indication of the vulnerability of the population left behind as many of these countries continue to  
13 westernise.<sup>57</sup>  
14  
15

16  
17 The high prevalence of obesity and T2D among migrant groups obviously is a result of a multitude of  
18 different factors. Thorough understanding of the factors is a prerequisite for efficient intervention and  
19 prevention. The rigorous characterisation of biochemical parameters and specific environmental  
20 factors as well as epigenetic factors will allow comparing the major pathophysiological aspects of  
21 obesity and T2D between African migrants and their compatriots who did not migrate. Epigenetic data  
22 have a huge potential to point to, as yet, unrecognised pathophysiological pathways in obesity and  
23 T2D, and thus reveal options for improved diagnosis and treatment.  
24

25  
26 The RODAM project will deliver up-to-date data on obesity and T2D among SSA migrants in Europe  
27 and their home country. This will allow us to draw conclusions on the magnitude of the problem and  
28 deduce the attributable risk of migration from rural to urban environment as well as migration to  
29 Europe for obesity and T2D. Our findings on the influence of migration (from Africa to Europe) will  
30 help health care providers and health policy stakeholders to better understand and predict comparable  
31 developments in other African populations and in other parts of the world; and to (re)direct efforts to  
32 the most obvious changes induced by migration that affect obesity and diabetes.  
33  
34  
35  
36  
37  
38  
39  
40  
41  
42  
43  
44  
45  
46  
47  
48  
49  
50  
51  
52  
53  
54  
55  
56  
57  
58  
59  
60

## References

1. Misra A, Ganda OP. Migration and its impact on adiposity and type 2 diabetes. *Nutrition* 2007;**23**:696-708.
2. Agyemang C, Owusu-Dabo E, de Jonge A, *et al*. Overweight and obesity among Ghanaian residents in The Netherlands: how do they weigh against their urban and rural counterparts in Ghana? *Public Health Nutr* 2009;**12**:909-16.
3. Agyemang C, Addo J, Bhopal R, *et al*. Cardiovascular disease, diabetes and established risk factors among populations of sub-Saharan African descent in Europe: a literature review. *Global Health* 2009;**5**:7.
4. Oldroyd J, Banerjee M, Heald A, *et al*. Diabetes and ethnic minorities. *Postgrad Med J* 2005;**81**:486-490.
5. Gill PS, Kai J, Bhopal RS, *et al*. Health Care Needs Assessment: Black and Minority Ethnic Groups. In: Raftery J (ed). *Health Care Needs Assessment. The epidemiologically based needs assessment reviews. Third Series*. Abingdon: Radcliffe Medical Press Ltd., 2006.
6. Health Survey for England 2004: Health of Ethnic Minorities. [[http://www.ic.nhs.uk/webfiles/publications/hlthsvyeng2004ethnic/HealthSurveyForEngland161205\\_PDF%20.pdf](http://www.ic.nhs.uk/webfiles/publications/hlthsvyeng2004ethnic/HealthSurveyForEngland161205_PDF%20.pdf)]
7. Abubakari AR, Bhopal RS. Systematic review on the prevalence of diabetes, overweight/obesity and physical inactivity in Ghanaians and Nigerians. *Public Health* 2008;**122**:173-82
8. Amoah AG, Owusu SK, Adjei S. Diabetes in Ghana: a community based prevalence study in Greater Accra. *Diabetes Res Clin Pract* 2002;**56**:197-205.
9. Abubakari AR, Lauder W, Agyemang C, *et al*. Prevalence and time trends in obesity among adult West African populations: a meta-analysis. *Obes Rev* 2008;**9**:297-311.
10. Amoah AG. Sociodemographic variations in obesity among Ghanaian adults. *Public Health Nutr*. 2003;**6**:751-7.
11. International Diabetes Federation. *Diabetes Atlas*. 5th ed. Brussels: International Diabetes Federation, 2011
12. Hossain P, Kowar B, El Nahas M. Obesity and diabetes in the developing world--a growing challenge. *N Engl J Med*. 2007;**356**:213-5.
13. Karter AJ, Ferrara A, Liu JY, *et al*. Ethnic disparities in diabetic complications in an insured population. *JAMA* 2002;**287**:2519-27.
14. Staiger H, Machicao F, Fritsche A, *et al*. Pathomechanisms of type 2 diabetes genes. *Endocr Rev*. 2009;**30**:557-85.
15. Freeman H, Cox RD. Type-2 diabetes: a cocktail of genetic discovery. *Hum Mol Genet* 2006;**15**:202-9.
16. Warner MJ, Ozanne SE. Mechanisms involved in the developmental programming of adulthood disease. *Biochem J*. 2010;**427**:333-47.
17. Hales CN, Barker DJ. Type 2 (non-insulin-dependent) diabetes mellitus: the thrifty phenotype hypothesis. *Diabetologia* 1992;**35**:595-601.
18. Van Speybroeck L. From epigenesis to epigenetics: the case of C. H. Waddington. *Ann N Y Acad Sci* 2002;**981**:61-81.
19. Plagemann A, Harder T, Brunn M, *et al*. Hypothalamic POMC promoter methylation becomes altered by early overfeeding: An epigenetic model of obesity and the metabolic syndrome. *J Physiol* 2009;**15**:587(Pt 20):4963-76.



- 1  
2  
3 20. Prentice AM. Early influences on human energy regulation: thrifty genotypes and thrifty  
4 phenotypes. *Physiol Behav* 2005;**86**:640-5.
- 5 21. Tobi EW, Lumey LH, Talens RP, *et al*. DANN methylation differences after exposure to prenatal  
6 famine are common and timing- and sex-specific. *Hum Mol Genet* 2009;**18**:4046-4053.
- 7  
8 22. Rock, Melanie. Sweet Blood and Social Suffering: Rethinking Cause-Effect Relationships in  
9 Diabetes, Distress and Duress. *Medical Anthropology* 2003;**22**:131-174.
- 10 23. Manson JE, Nathan DM, Krolewski AS, *et al*. A prospective study of exercise and incidence of  
11 diabetes among US male physicians. *JAMA* 1992;**268**:63-7.
- 12 24. Williamson DF, Madans J, Anda RF, *et al*. Recreational physical activity and ten-year weight  
13 change in a US national cohort. *Int J Obes Relat Metab Disord* 1993;**17**:279.
- 14 25. Hamman RF. Genetic and environmental determinants of non-insulin-dependent diabetes mellitus  
15 (NIDDM). *Diabetes Metab Rev* 1992;**8**:287-338.
- 16 26. Miller WC, Koejia DM, Hamilton EJ. A meta-analysis of the past 25 years of weight loss research  
17 using diet, exercise or diet plus exercise intervention. *Int J Obes Relat Metab Disord* 1997;**21**:941-  
18 7.
- 19 27. Tuomilehto J, Lindström J, Eriksson JG, *et al*; Finnish Diabetes Prevention Study Group.  
20 Prevention of type 2 diabetes mellitus by changes in lifestyle among subjects with impaired  
21 glucose tolerance. *N Engl J Med* 2001;**344**:1343-50.
- 22 28. Uitewaal PJ, Voorham AJ, Bruijnzeels MA, *et al*. No clear effect of diabetes education on  
23 glycaemic control for Turkish type 2 diabetes patients: a controlled experiment in general practice.  
24 *Neth J Med*. 2005;**63**:428-34.
- 25 29. Scott P, Rajan L. Eating habits and reactions to dietary advice among two generations of  
26 Caribbean people: a South London study, part 2. *Practical Diabetes International* 2000;**17**:213-  
27 216.
- 28 30. Agyemang C, Kunst AE, Stronks K. Ethnic inequalities in health: does it matter where you have  
29 migrated to? *Ethn Health*. 2010;**15**:216-8.
- 30 31. Fernades A, Miguel JP. *Health and migration in the European union: better health for all in an*  
31 *inclusive society*. Lisbon: Instituto Nacional de Saúde Doutor Ricardo Jorge. 2009.
- 32 32. Agyemang C, Kunst AE, Bhopal R, *et al*. Diabetes prevalence in populations of South Asian  
33 Indian and African origins: a comparison of England and the Netherlands. *Epidemiology*.  
34 2011;**22**:563-7.
- 35 33. World Health Organization. *Health of migrants - the way forward. Report of a global*  
36 *consultation*. Madrid: World Health Organization, 2010.
- 37 34. Office for National Statistics. *Estimated population resident in the United Kingdom, by foreign*  
38 *country of birth (Table 1.3)*. London: 2009.
- 39 35. German Technical Cooperation (GTZ). *Die ghanaische Diaspora in Deutschland - Ihr Beitrag zur*  
40 *Entwicklung Ghanas*. Eschborn: 2009.
- 41 36. Central Bureau for Statistics. *Statistical yearbook 2009. Statistics Netherlands Facility Services*.  
42 The Hague: Henri Faasdreef 312, 2492 JP, 2009
- 43 37. Elam G, Chinouya M, Nazroo J. *Feasibility study for health surveys among black African people*  
44 *living in England Final report - implications for the Health Survey for England 2003*. London:  
45 Joint Health Surveys Unit National Centre for Social Research, 2001.
- 46 38. Agyemang C, Nicolaou M, Boateng L, *et al*. Prevalence, awareness, treatment, and control of  
47 hypertension among Ghanaian population in Amsterdam, the Netherlands: the GHAI study. *Eur*  
48 *J Prev Cardiol*. 2013;**20**:938-46.
- 49  
50  
51  
52  
53  
54  
55  
56  
57  
58  
59  
60



- 1
  - 2
  - 3
  - 4
  - 5
  - 6
  - 7
  - 8
  - 9
  - 10
  - 11
  - 12
  - 13
  - 14
  - 15
  - 16
  - 17
  - 18
  - 19
  - 20
  - 21
  - 22
  - 23
  - 24
  - 25
  - 26
  - 27
  - 28
  - 29
  - 30
  - 31
  - 32
  - 33
  - 34
  - 35
  - 36
  - 37
  - 38
  - 39
  - 40
  - 41
  - 42
  - 43
  - 44
  - 45
  - 46
  - 47
  - 48
  - 49
  - 50
  - 51
  - 52
  - 53
  - 54
  - 55
  - 56
  - 57
  - 58
  - 59
  - 60
39. Nicolaou M, Kunst AE, Busschers WB, *et al.* Differences in Body Fat Distribution Play a Role in the Lower Levels of Elevated Fasting Glucose amongst Ghanaian Migrant Women Compared to Men. *PLoS One*. 2013;**8**:e66516.
40. American Diabetes Association. Diagnosis and classification of diabetes mellitus. *Diabetes Care*. 2010;**33**(Suppl 1):S62-9.
41. WHO. *Obesity: preventing and managing the global epidemic. Report of a WHO consultation.* World Health Organ Tech Rep Ser 2000;894:i.
42. Clinical Guidelines on the Identification, Evaluation, and Treatment of Overweight and Obesity in Adults -The Evidence Report. National Institutes of Health. *Obes Res* 1998;(6 Suppl 2):51S.
43. Bull FC, Maslin TS, Armstrong T. Global physical activity questionnaire (GPAQ): nine country reliability and validity study. *J Phys Act Health*. 2009;**6**:790-804.
44. Larson CO, Schlundt D, Patel K, Beard K, Hargreaves M. Validity of the SF-12 for use in a low-income African American community-based research initiative (REACH 2010). *Prev Chronic Dis*. 2008;**5**:A44
45. Williams DR, Yan Yu, Jackson JS, *et al.* Racial Differences in Physical and Mental Health: Socio-economic Status, Stress and Discrimination. *J Health Psychol*. 1997;**2**:335-51.
46. Suurmeijer TP, Doeglas DM, Briançon S, *et al.* The measurement of social support in the 'European Research on Incapacitating Diseases and Social Support': the development of the Social Support Questionnaire for Transactions (SSQT). *Soc Sci Med*. 1995;**40**:1221-9.
47. Pearlin LI, Schooler C. The structure of coping. *J Health and Social Behavior* 1978;**19**:2-21.
48. Brugha TS, Cragg D. The List of Threatening Experiences: the reliability and validity of a brief life events questionnaire. *Acta Psychiatr Scand* 1990;**82**:77-81.
49. Yusuf S, Hawken S, Ounpuu S, *et al*; INTERHEART Study Investigators. Effect of potentially modifiable risk factors associated with myocardial infarction in 52 countries (the INTERHEART study): case-control study. *Lancet*. 2004;**364**(9438):937-52.
50. Kroenke K, Spitzer RL, Williams JB, *et al.* The Patient Health Questionnaire Somatic, Anxiety and Depressive Symptom Scales: a systematic review. *Gen Hosp Psychiatry* 2010;**32**: 3445-359
51. Pulvers KM, Lee RE, Kaur H, *et al.* Development of a culturally relevant body image instrument among urban African Americans. *Obes Res*. 2004;**12**:1641-51.
52. Nieuwkerk PT, de Boer-van der Kolk IM, Prins JM, *et al.* Self-reported adherence is more predictive of virological treatment response among patients with a lower tendency towards socially desirable responding. *Antivir Ther*. 2010;**15**:913-6.
53. Chan A, Cockram C, Swaminathan R. Effect of delay in separating plasma for glucose measurement upon the interpretation of oral glucose tolerance tests. *Ann Clin Biochem* 1990;**27**:73-4.
54. Moscovici S. The phenomenon of social representations. In: Farr RM, Moscovici S (Eds.), *Social representations*. Cambridge: Cambridge University Press, 1984.
55. de-Graft Aikins, A. Healer-shopping in Africa: new evidence from a rural-urban qualitative study of Ghanaian diabetes experiences. *BMJ* 2005;**331**:737
56. Organization for Economic Cooperation and Development. Table A.1.1. *Inflows of Foreign Population into Selected OECD Countries. International Migration Outlook*. Sopemi, 2006.
57. Agyemang C, de-Graft Aikins A, Bhopal R. Ethnicity and cardiovascular health research: pushing the boundaries by including comparison populations in the countries of origin. *Ethn Health* 2012;**17**:579-96.

**Authors' contributions**

CA, EO, AGA, LS, JA, FM, ID, MBS, JS, KG, SB, AZ, AK & KS developed the origin grant proposal. CA, EB & KM prepared the first draft with the support of all authors. All authors read and approved the final manuscript.

**Funding statement:**

This work is supported by the European Commission under the Framework Programme (**Grant Number: 278901**).

**Acknowledgement**

We are very grateful to the advisory board members for their valuable support in shaping the methods, and to the Ghanaian volunteers participating in this project.

1  
2  
3  
4  
5  
6  
7  
8  
9  
10  
11  
12  
13  
14  
15  
16  
17  
18  
19  
20  
21  
22  
23  
24  
25  
26  
27  
28  
29  
30  
31  
32  
33  
34  
35  
36  
37  
38  
39  
40  
41  
42  
43  
44  
45  
46  
47  
48  
49  
50  
51  
52  
53  
54  
55  
56  
57  
58  
59  
60

Figure legend

**Figure 1: A conceptual model for the RODAM project.**

For peer review only

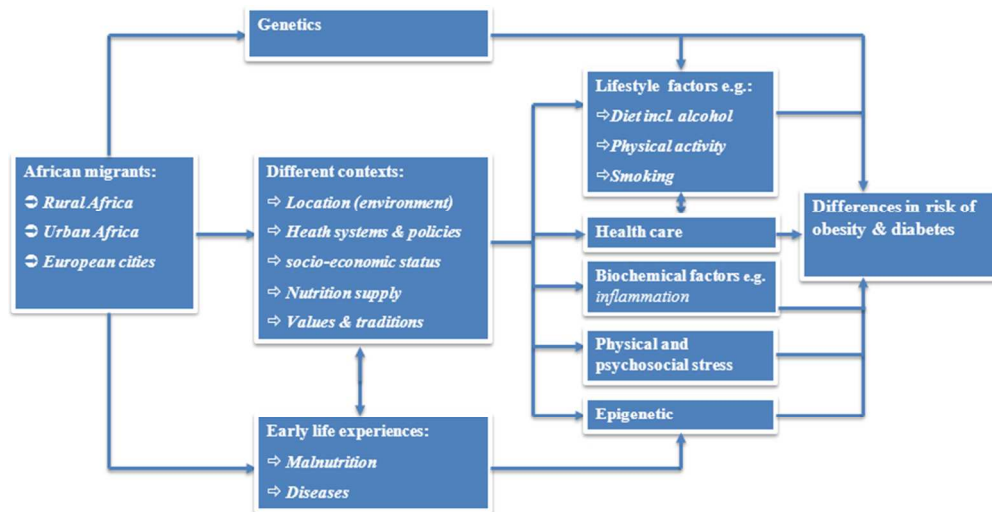

A conceptual model for the RODAM project  
73x38mm (300 x 300 DPI)

er review only

1  
2  
3  
4  
5  
6  
7  
8  
9  
10  
11  
12  
13  
14  
15  
16  
17  
18  
19  
20  
21  
22  
23  
24  
25  
26  
27  
28  
29  
30  
31  
32  
33  
34  
35  
36  
37  
38  
39  
40  
41  
42  
43  
44  
45  
46  
47  
48  
49  
50  
51  
52  
53  
54  
55  
56  
57  
58  
59  
60
